# Supplementary material for: Aggregation-dependent epitope sequence and modification fingerprints of anti-Aβ antibodies
Source: eLife journal article supplement (doi:10.7554/elife.106156), 2025-05-09
Supplement: fig3-data1 [file elife-106156-fig3-data1-v1.xlsx]

## Sheet: Sheet1
Antibody	Peptide	EC50 [nmol/L]
Aducanumabbs	DAEFRHDSGYEVHHQ	1.17
Aducanumabbs	DAEFRHD(p)SGYEVHHQ	0.00361
1E4E11	DAEFRHDSGYEVHHQ	1.69
1E4E11	DAEFRHD(p)SGYEVHHQ	0.099
