# Supplementary material for: Aggregation-dependent epitope sequence and modification fingerprints of anti-Aβ antibodies
Source: eLife journal article supplement (doi:10.7554/elife.106156), 2025-05-09
Supplement: fig5-data2 [file Original blot image files-Fig5A.docx]

Fig. 5 A, labelled:


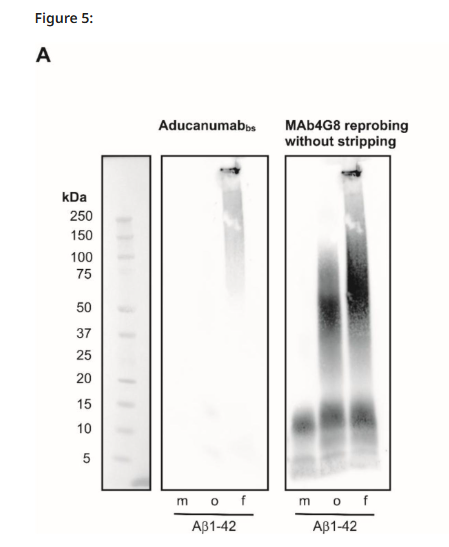


- Original Raw Tif image: **Prestained MW Markers**:
  2024-05-08-Aduacanumab_Lecanemab_Marker.Tif
- Original Raw Tif image **Aducanumab** probing:
  2024-05-08_Aducanumab_Lecanemab_5min.Tif
- Uncropped image **Aducanumab** probing with relevant bands labelled (inverted)
  Fig-5A_Aduacanumab-uncropped-inverted-modified-labelled.Tif
- Original Raw Tif image: **4G8 reprobing**:
  2024-05-08_Aducanumab_Lecanemab_Nachgefärbt_1min.Tif
- Uncropped image **4G8 reprobing** with relevant bands labelled:
  Fig-5A-4G8-uncropped-inverted-modified-labelled
