# Supplementary material for: Aggregation-dependent epitope sequence and modification fingerprints of anti-Aβ antibodies
Source: eLife journal article supplement (doi:10.7554/elife.106156), 2025-05-09
Supplement: fig6-data2 [file Original blot image files-Fig6B.docx]

Fig. 6B, markers labelled:


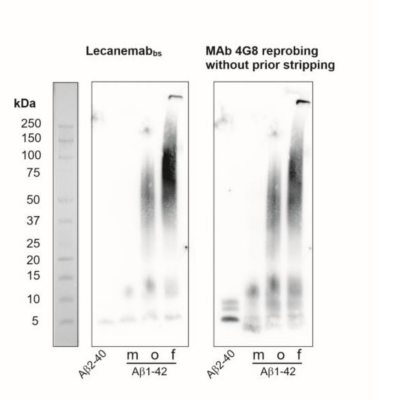


(B) Synthetic Aβ2-40 (361 ng), and monomerized (m), oligomeric (o) and fibrillar (f) preparations of Aβ1-42 (361 ng of each) were separated by 4-12% Bistris SDS-PAGE, blotted onto nitrocellulose and probed with Lecanemabbs (0.5 µg/mL). Exposure: 2 min 7.5 sec; F 0.84; image display: high: 47545; low: 0; gamma: 1.0. After blot development, the blot membrane was reprobed with mAb 4G8 without prior stripping. That way the 4G8 signals were essentially added on top of the initial Lecanemabbs signals and background artifacts. Exposure: 1 min F 0.84; image display: high: 46277; low: 0; gamma: 1.0.

- Original Raw Tif image: **Prestained MW Markers**:
  2024-05-08_Aducanumab_Lecanemab_Marker.Tif
- Original Raw Tif image **Lecanemab** probing:
  2024-05-08_Aducanumab_Lecanemab_2min7,5sec.Tif
- Uncropped image **Lecanemab** probing with relevant bands labelled (inverted)
  Fig-6B-Lecanemab-uncropped-modified-labelled.tif
- Original Raw Tif image: **4G8 reprobing**:
  2024-05-08:_Aducanumab_Lecanemab _1min.Tif
- Uncropped image **4G8 reprobing** with relevant bands labelled:
  Fig-6B-4G8 reprobing-uncropped-modified-labelled.tif
