# Supplementary material for: Aggregation-dependent epitope sequence and modification fingerprints of anti-Aβ antibodies
Source: eLife journal article supplement (doi:10.7554/elife.106156), 2025-05-09
Supplement: fig6-data2 [file Original blot image files-Fig6C.docx]

Fig. 6C, labelled:


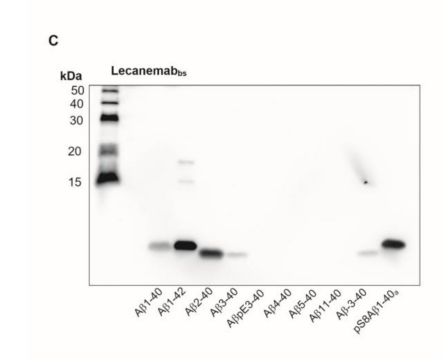


(C) The indicated Aβ peptides (50 ng of each) were separated by Bicine Tris (peptide) SDS PAGE, blotted on PVDF, and probed with Lecanemabbs . Exposure: 5 min F 0.84, image display: high: 65535; low: 0; gamma: 0.85.

- Original Raw Tif image **Lecanemab** probing:
  2024-03-07_Donanemab_Lecanemab_5min.Tif
- Uncropped image **Lecanemab** probing with relevant bands labelled (inverted)
  Fig-6C uncropped modified labelled.tif
