# Supplementary material for: Aggregation-dependent epitope sequence and modification fingerprints of anti-Aβ antibodies
Source: eLife journal article supplement (doi:10.7554/elife.106156), 2025-05-09
Supplement: fig6-data2 [file Original blot image files-Fig6D.docx]

Fig. 6D, labelled:


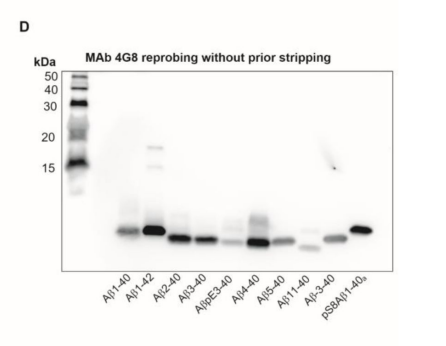


(D) To confirm loading and successful blotting of all Aβ peptides, the blot membrane was re-probed with mAb 4G8 without prior stripping (see above). Exposure: 5 min F 0.84; image display: high: 65535; low: 0; gamma: 1.0.

- Original Raw Tif image **mAb4G8** reprobing:
  2024-03-07_Donanemab_Lecanemab_Nachfärben_4G8_5min.Tif
- Uncropped image **mAb4G8** reprobing with relevant bands labelled (inverted):
  Fig 6D uncropped modified labelled.tif
