# Supplementary material for: Aggregation-dependent epitope sequence and modification fingerprints of anti-Aβ antibodies
Source: eLife journal article supplement (doi:10.7554/elife.106156), 2025-05-09
Supplement: fig7-data2 [file Original blot image files-Fig7C.docx]

Fig. 7C, labelled:


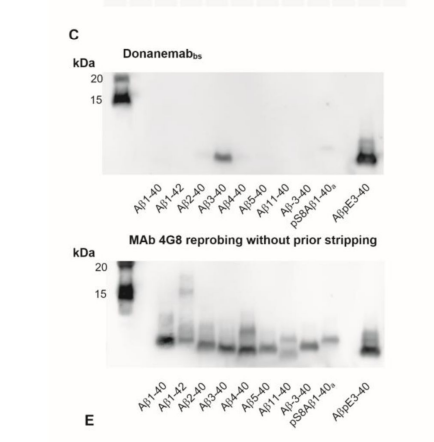


(C) Synthetic Aβ peptides (50 ng per lane) were separated by Bicine Tris (peptide) SDS-PAGE, blotted on PVDF and probed with Donanemabbs (0.5 µg/mL) (upper image). Exposure: 5 min F 0.84; image display: high: 59406; low: 0; Gamma: 0.65. To confirm that all Aβ variants were loaded and blotted, the blot membrane was reprobed with mAb 4G8 without prior stripping. That way, the 4G8 signals were essentially added on top of the initial Donanemabbs signals and background artifacts (lower image). Exposure: 5 min F 0.84; image display: high: 65535; low: 0; gamma: 0.77.

- Original Raw Tif image **Donanemab**:
  2024-03-13_Aducanumab_Donanemab_5min.TIF
- Uncropped image inverted and modified with relevant section indicated and labelled:
  Fig 7C Donanemab uncropped inverted modified labelled.tif
- Original Raw Tif image 4G8 reprobing
  2024-03-13_Aducanumab_Donanemab_Nachfärben_5min.Tif
- Uncropped image inverted and modified with relevant section indicated and labelled:
  Fig 7 C 4G8 reprobing inverted modified labelled.tif
