# Supplementary material for: Aggregation-dependent epitope sequence and modification fingerprints of anti-Aβ antibodies
Source: eLife journal article supplement (doi:10.7554/elife.106156), 2025-05-09
Supplement: fig7-data2 [file Original blot image files-Fig7D.docx]

Fig. 7D, labelled:


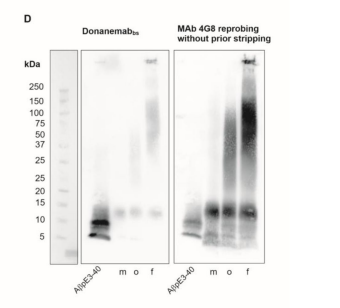


(D) AβpE3-40 and Aβ1-42 monomer (m), oligomer (o) and fibril preparations (f) were separated by 4-12% Bistris SDS-PAGE, blotted onto nitrocellulose and probed with Donanemabbs (image display: High: 64091; Low: 0; Gamma: 0.75), followed by reprobing without prior stripping with mAb4G8 (image display: High: 46984; Low: 0; Gamma: 1.0). The positions of prestained protein marker bands on the blot membrane are shown on the left-hand side.

- Original Raw Tif image **Donanemab**:
  2024-04-03_Aducanumab_Donanemab_5min.Tif
- Uncropped image **Donanemab** inverted modified labelled with relevant blot section highlighted
  Fig7D Donanemab-uncropped inverted modified labelled.tif
- Original Raw Tif image **reprobing with mAb 4G8**
  2024-04-04_Aducanumab_Donanemab _37.9sec.Tif
- Uncropped image **mAb 4G8 reprobing** inverted modified labelled.tif:
  Fig7D-4G8-reprobing uncropped inverted modified labelled
- Original Raw Tif image: Prestained MW Markers:
  2024-04-03_Aducanumab_Donanemab_Marker.Tif
