# Supplementary material for: Aggregation-dependent epitope sequence and modification fingerprints of anti-Aβ antibodies
Source: eLife journal article supplement (doi:10.7554/elife.106156), 2025-05-09
Supplement: supp1 [file elife-106156-supp1-v1.xlsx]

## Sheet: Sheet2
index	Name	peptide sequence
1	FLAG_01	DYKDDDDK		pS=2
2	FLAG_02	DYKDDDDA		d,isoD=6
3	FLAG_03	DYKDDDAK		l,isoD=7
4	Abeta_fineMapping_001	GLTTRPGSGLTNIKT		d,D=5
5	Abeta_fineMapping_002	LTTRPGSGLTNIKTE		pyE=5
6	Abeta_fineMapping_003	TTRPGSGLTNIKTEE
7	Abeta_fineMapping_004	TRPGSGLTNIKTEEI
8	Abeta_fineMapping_005	RPGSGLTNIKTEEIS
9	Abeta_fineMapping_006	PGSGLTNIKTEEISE
10	Abeta_fineMapping_007	GSGLTNIKTEEISEV
11	Abeta_fineMapping_008	SGLTNIKTEEISEVK
12	Abeta_fineMapping_009	GLTNIKTEEISEVKM
13	Abeta_fineMapping_010	LTNIKTEEISEVKMD
14	Abeta_fineMapping_011	TNIKTEEISEVKMDA
15	Abeta_fineMapping_012	NIKTEEISEVKMDAE
16	Abeta_fineMapping_013	IKTEEISEVKMDAEF
17	Abeta_fineMapping_014	KTEEISEVKMDAEFR
18	Abeta_fineMapping_015	TEEISEVKMDAEFRH
19	Abeta_fineMapping_016	EEISEVKMDAEFRHD
20	Abeta_fineMapping_017	EISEVKMDAEFRHDS
21	Abeta_fineMapping_018	ISEVKMDAEFRHDSG
22	Abeta_fineMapping_019	SEVKMDAEFRHDSGY
23	Abeta_fineMapping_020	EVKMDAEFRHDSGYE
24	Abeta_fineMapping_021	VKMDAEFRHDSGYEV
25	Abeta_fineMapping_022	KMDAEFRHDSGYEVH
26	Abeta_fineMapping_023	MDAEFRHDSGYEVHH
27	Abeta_fineMapping_024	DAEFRHDSGYEVHHQ
28	Abeta_fineMapping_025	AEFRHDSGYEVHHQK
29	Abeta_fineMapping_026	EFRHDSGYEVHHQKL
30	Abeta_fineMapping_027	FRHDSGYEVHHQKLV
31	Abeta_fineMapping_028	RHDSGYEVHHQKLVF
32	Abeta_fineMapping_029	HDSGYEVHHQKLVFF
33	Abeta_fineMapping_030	DSGYEVHHQKLVFFA
34	Abeta_fineMapping_031	SGYEVHHQKLVFFAE
35	Abeta_fineMapping_032	GYEVHHQKLVFFAED
36	Abeta_fineMapping_033	YEVHHQKLVFFAEDV
37	Abeta_fineMapping_034	EVHHQKLVFFAEDVG
38	Abeta_fineMapping_035	VHHQKLVFFAEDVGS
39	Abeta_fineMapping_036	HHQKLVFFAEDVGSN
40	Abeta_fineMapping_037	HQKLVFFAEDVGSNK
41	Abeta_fineMapping_038	QKLVFFAEDVGSNKG
42	Abeta_fineMapping_039	KLVFFAEDVGSNKGA
43	Abeta_fineMapping_040	LVFFAEDVGSNKGAI
44	Abeta_fineMapping_041	VFFAEDVGSNKGAII
45	Abeta_fineMapping_042	FFAEDVGSNKGAIIG
46	Abeta_fineMapping_043	FAEDVGSNKGAIIGL
47	Abeta_fineMapping_044	AEDVGSNKGAIIGLM
48	Abeta_fineMapping_045	EDVGSNKGAIIGLMV
49	Abeta_fineMapping_046	DVGSNKGAIIGLMVG
50	Abeta_fineMapping_047	VGSNKGAIIGLMVGG
51	Abeta_fineMapping_048	GSNKGAIIGLMVGGV
52	Abeta_fineMapping_049	SNKGAIIGLMVGGVV
53	Abeta_fineMapping_050	NKGAIIGLMVGGVVI
54	Abeta_fineMapping_051	KGAIIGLMVGGVVIA
55	Abeta_fineMapping_052	GAIIGLMVGGVVIAT
56	Abeta_fineMapping_053	AIIGLMVGGVVIATV
57	Abeta_fineMapping_054	IIGLMVGGVVIATVI
58	Abeta_fineMapping_055	IGLMVGGVVIATVIV
59	Abeta_fineMapping_056	GLMVGGVVIATVIVI
60	Abeta_fineMapping_057	LMVGGVVIATVIVIT
61	Abeta_fineMapping_058	MVGGVVIATVIVITL
62	Abeta_fineMapping_059	VGGVVIATVIVITLV
63	Abeta_fineMapping_060	GGVVIATVIVITLVM
64	FP_-K10-S8_001	ATEEISEVKMDAEFRHDS
65	FP_-K10-S8_002	CTEEISEVKMDAEFRHDS
66	FP_-K10-S8_003	DTEEISEVKMDAEFRHDS
67	FP_-K10-S8_004	ETEEISEVKMDAEFRHDS
68	FP_-K10-S8_005	FTEEISEVKMDAEFRHDS
69	FP_-K10-S8_006	GTEEISEVKMDAEFRHDS
70	FP_-K10-S8_007	HTEEISEVKMDAEFRHDS
71	FP_-K10-S8_008	ITEEISEVKMDAEFRHDS
72	FP_-K10-S8_009	KTEEISEVKMDAEFRHDS
73	FP_-K10-S8_010	LTEEISEVKMDAEFRHDS
74	FP_-K10-S8_011	MTEEISEVKMDAEFRHDS
75	FP_-K10-S8_012	NTEEISEVKMDAEFRHDS
76	FP_-K10-S8_013	PTEEISEVKMDAEFRHDS
77	FP_-K10-S8_014	QTEEISEVKMDAEFRHDS
78	FP_-K10-S8_015	RTEEISEVKMDAEFRHDS
79	FP_-K10-S8_016	STEEISEVKMDAEFRHDS
80	FP_-K10-S8_017	TTEEISEVKMDAEFRHDS
81	FP_-K10-S8_018	VTEEISEVKMDAEFRHDS
82	FP_-K10-S8_019	WTEEISEVKMDAEFRHDS
83	FP_-K10-S8_020	YTEEISEVKMDAEFRHDS
84	FP_-K10-S8_021	KAEEISEVKMDAEFRHDS
85	FP_-K10-S8_022	KCEEISEVKMDAEFRHDS
86	FP_-K10-S8_023	KDEEISEVKMDAEFRHDS
87	FP_-K10-S8_024	KEEEISEVKMDAEFRHDS
88	FP_-K10-S8_025	KFEEISEVKMDAEFRHDS
89	FP_-K10-S8_026	KGEEISEVKMDAEFRHDS
90	FP_-K10-S8_027	KHEEISEVKMDAEFRHDS
91	FP_-K10-S8_028	KIEEISEVKMDAEFRHDS
92	FP_-K10-S8_029	KKEEISEVKMDAEFRHDS
93	FP_-K10-S8_030	KLEEISEVKMDAEFRHDS
94	FP_-K10-S8_031	KMEEISEVKMDAEFRHDS
95	FP_-K10-S8_032	KNEEISEVKMDAEFRHDS
96	FP_-K10-S8_033	KPEEISEVKMDAEFRHDS
97	FP_-K10-S8_034	KQEEISEVKMDAEFRHDS
98	FP_-K10-S8_035	KREEISEVKMDAEFRHDS
99	FP_-K10-S8_036	KSEEISEVKMDAEFRHDS
100	FP_-K10-S8_037	KTEEISEVKMDAEFRHDS
101	FP_-K10-S8_038	KVEEISEVKMDAEFRHDS
102	FP_-K10-S8_039	KWEEISEVKMDAEFRHDS
103	FP_-K10-S8_040	KYEEISEVKMDAEFRHDS
104	FP_-K10-S8_041	KTAEISEVKMDAEFRHDS
105	FP_-K10-S8_042	KTCEISEVKMDAEFRHDS
106	FP_-K10-S8_043	KTDEISEVKMDAEFRHDS
107	FP_-K10-S8_044	KTEEISEVKMDAEFRHDS
108	FP_-K10-S8_045	KTFEISEVKMDAEFRHDS
109	FP_-K10-S8_046	KTGEISEVKMDAEFRHDS
110	FP_-K10-S8_047	KTHEISEVKMDAEFRHDS
111	FP_-K10-S8_048	KTIEISEVKMDAEFRHDS
112	FP_-K10-S8_049	KTKEISEVKMDAEFRHDS
113	FP_-K10-S8_050	KTLEISEVKMDAEFRHDS
114	FP_-K10-S8_051	KTMEISEVKMDAEFRHDS
115	FP_-K10-S8_052	KTNEISEVKMDAEFRHDS
116	FP_-K10-S8_053	KTPEISEVKMDAEFRHDS
117	FP_-K10-S8_054	KTQEISEVKMDAEFRHDS
118	FP_-K10-S8_055	KTREISEVKMDAEFRHDS
119	FP_-K10-S8_056	KTSEISEVKMDAEFRHDS
120	FP_-K10-S8_057	KTTEISEVKMDAEFRHDS
121	FP_-K10-S8_058	KTVEISEVKMDAEFRHDS
122	FP_-K10-S8_059	KTWEISEVKMDAEFRHDS
123	FP_-K10-S8_060	KTYEISEVKMDAEFRHDS
124	FP_-K10-S8_061	KTEAISEVKMDAEFRHDS
125	FP_-K10-S8_062	KTECISEVKMDAEFRHDS
126	FP_-K10-S8_063	KTEDISEVKMDAEFRHDS
127	FP_-K10-S8_064	KTEEISEVKMDAEFRHDS
128	FP_-K10-S8_065	KTEFISEVKMDAEFRHDS
129	FP_-K10-S8_066	KTEGISEVKMDAEFRHDS
130	FP_-K10-S8_067	KTEHISEVKMDAEFRHDS
131	FP_-K10-S8_068	KTEIISEVKMDAEFRHDS
132	FP_-K10-S8_069	KTEKISEVKMDAEFRHDS
133	FP_-K10-S8_070	KTELISEVKMDAEFRHDS
134	FP_-K10-S8_071	KTEMISEVKMDAEFRHDS
135	FP_-K10-S8_072	KTENISEVKMDAEFRHDS
136	FP_-K10-S8_073	KTEPISEVKMDAEFRHDS
137	FP_-K10-S8_074	KTEQISEVKMDAEFRHDS
138	FP_-K10-S8_075	KTERISEVKMDAEFRHDS
139	FP_-K10-S8_076	KTESISEVKMDAEFRHDS
140	FP_-K10-S8_077	KTETISEVKMDAEFRHDS
141	FP_-K10-S8_078	KTEVISEVKMDAEFRHDS
142	FP_-K10-S8_079	KTEWISEVKMDAEFRHDS
143	FP_-K10-S8_080	KTEYISEVKMDAEFRHDS
144	FP_-K10-S8_081	KTEEASEVKMDAEFRHDS
145	FP_-K10-S8_082	KTEECSEVKMDAEFRHDS
146	FP_-K10-S8_083	KTEEDSEVKMDAEFRHDS
147	FP_-K10-S8_084	KTEEESEVKMDAEFRHDS
148	FP_-K10-S8_085	KTEEFSEVKMDAEFRHDS
149	FP_-K10-S8_086	KTEEGSEVKMDAEFRHDS
150	FP_-K10-S8_087	KTEEHSEVKMDAEFRHDS
151	FP_-K10-S8_088	KTEEISEVKMDAEFRHDS
152	FP_-K10-S8_089	KTEEKSEVKMDAEFRHDS
153	FP_-K10-S8_090	KTEELSEVKMDAEFRHDS
154	FP_-K10-S8_091	KTEEMSEVKMDAEFRHDS
155	FP_-K10-S8_092	KTEENSEVKMDAEFRHDS
156	FP_-K10-S8_093	KTEEPSEVKMDAEFRHDS
157	FP_-K10-S8_094	KTEEQSEVKMDAEFRHDS
158	FP_-K10-S8_095	KTEERSEVKMDAEFRHDS
159	FP_-K10-S8_096	KTEESSEVKMDAEFRHDS
160	FP_-K10-S8_097	KTEETSEVKMDAEFRHDS
161	FP_-K10-S8_098	KTEEVSEVKMDAEFRHDS
162	FP_-K10-S8_099	KTEEWSEVKMDAEFRHDS
163	FP_-K10-S8_100	KTEEYSEVKMDAEFRHDS
164	FP_-K10-S8_101	KTEEIAEVKMDAEFRHDS
165	FP_-K10-S8_102	KTEEICEVKMDAEFRHDS
166	FP_-K10-S8_103	KTEEIDEVKMDAEFRHDS
167	FP_-K10-S8_104	KTEEIEEVKMDAEFRHDS
168	FP_-K10-S8_105	KTEEIFEVKMDAEFRHDS
169	FP_-K10-S8_106	KTEEIGEVKMDAEFRHDS
170	FP_-K10-S8_107	KTEEIHEVKMDAEFRHDS
171	FP_-K10-S8_108	KTEEIIEVKMDAEFRHDS
172	FP_-K10-S8_109	KTEEIKEVKMDAEFRHDS
173	FP_-K10-S8_110	KTEEILEVKMDAEFRHDS
174	FP_-K10-S8_111	KTEEIMEVKMDAEFRHDS
175	FP_-K10-S8_112	KTEEINEVKMDAEFRHDS
176	FP_-K10-S8_113	KTEEIPEVKMDAEFRHDS
177	FP_-K10-S8_114	KTEEIQEVKMDAEFRHDS
178	FP_-K10-S8_115	KTEEIREVKMDAEFRHDS
179	FP_-K10-S8_116	KTEEISEVKMDAEFRHDS
180	FP_-K10-S8_117	KTEEITEVKMDAEFRHDS
181	FP_-K10-S8_118	KTEEIVEVKMDAEFRHDS
182	FP_-K10-S8_119	KTEEIWEVKMDAEFRHDS
183	FP_-K10-S8_120	KTEEIYEVKMDAEFRHDS
184	FP_-K10-S8_121	KTEEISAVKMDAEFRHDS
185	FP_-K10-S8_122	KTEEISCVKMDAEFRHDS
186	FP_-K10-S8_123	KTEEISDVKMDAEFRHDS
187	FP_-K10-S8_124	KTEEISEVKMDAEFRHDS
188	FP_-K10-S8_125	KTEEISFVKMDAEFRHDS
189	FP_-K10-S8_126	KTEEISGVKMDAEFRHDS
190	FP_-K10-S8_127	KTEEISHVKMDAEFRHDS
191	FP_-K10-S8_128	KTEEISIVKMDAEFRHDS
192	FP_-K10-S8_129	KTEEISKVKMDAEFRHDS
193	FP_-K10-S8_130	KTEEISLVKMDAEFRHDS
194	FP_-K10-S8_131	KTEEISMVKMDAEFRHDS
195	FP_-K10-S8_132	KTEEISNVKMDAEFRHDS
196	FP_-K10-S8_133	KTEEISPVKMDAEFRHDS
197	FP_-K10-S8_134	KTEEISQVKMDAEFRHDS
198	FP_-K10-S8_135	KTEEISRVKMDAEFRHDS
199	FP_-K10-S8_136	KTEEISSVKMDAEFRHDS
200	FP_-K10-S8_137	KTEEISTVKMDAEFRHDS
201	FP_-K10-S8_138	KTEEISVVKMDAEFRHDS
202	FP_-K10-S8_139	KTEEISWVKMDAEFRHDS
203	FP_-K10-S8_140	KTEEISYVKMDAEFRHDS
204	FP_-K10-S8_141	KTEEISEAKMDAEFRHDS
205	FP_-K10-S8_142	KTEEISECKMDAEFRHDS
206	FP_-K10-S8_143	KTEEISEDKMDAEFRHDS
207	FP_-K10-S8_144	KTEEISEEKMDAEFRHDS
208	FP_-K10-S8_145	KTEEISEFKMDAEFRHDS
209	FP_-K10-S8_146	KTEEISEGKMDAEFRHDS
210	FP_-K10-S8_147	KTEEISEHKMDAEFRHDS
211	FP_-K10-S8_148	KTEEISEIKMDAEFRHDS
212	FP_-K10-S8_149	KTEEISEKKMDAEFRHDS
213	FP_-K10-S8_150	KTEEISELKMDAEFRHDS
214	FP_-K10-S8_151	KTEEISEMKMDAEFRHDS
215	FP_-K10-S8_152	KTEEISENKMDAEFRHDS
216	FP_-K10-S8_153	KTEEISEPKMDAEFRHDS
217	FP_-K10-S8_154	KTEEISEQKMDAEFRHDS
218	FP_-K10-S8_155	KTEEISERKMDAEFRHDS
219	FP_-K10-S8_156	KTEEISESKMDAEFRHDS
220	FP_-K10-S8_157	KTEEISETKMDAEFRHDS
221	FP_-K10-S8_158	KTEEISEVKMDAEFRHDS
222	FP_-K10-S8_159	KTEEISEWKMDAEFRHDS
223	FP_-K10-S8_160	KTEEISEYKMDAEFRHDS
224	FP_-K10-S8_161	KTEEISEVAMDAEFRHDS
225	FP_-K10-S8_162	KTEEISEVCMDAEFRHDS
226	FP_-K10-S8_163	KTEEISEVDMDAEFRHDS
227	FP_-K10-S8_164	KTEEISEVEMDAEFRHDS
228	FP_-K10-S8_165	KTEEISEVFMDAEFRHDS
229	FP_-K10-S8_166	KTEEISEVGMDAEFRHDS
230	FP_-K10-S8_167	KTEEISEVHMDAEFRHDS
231	FP_-K10-S8_168	KTEEISEVIMDAEFRHDS
232	FP_-K10-S8_169	KTEEISEVKMDAEFRHDS
233	FP_-K10-S8_170	KTEEISEVLMDAEFRHDS
234	FP_-K10-S8_171	KTEEISEVMMDAEFRHDS
235	FP_-K10-S8_172	KTEEISEVNMDAEFRHDS
236	FP_-K10-S8_173	KTEEISEVPMDAEFRHDS
237	FP_-K10-S8_174	KTEEISEVQMDAEFRHDS
238	FP_-K10-S8_175	KTEEISEVRMDAEFRHDS
239	FP_-K10-S8_176	KTEEISEVSMDAEFRHDS
240	FP_-K10-S8_177	KTEEISEVTMDAEFRHDS
241	FP_-K10-S8_178	KTEEISEVVMDAEFRHDS
242	FP_-K10-S8_179	KTEEISEVWMDAEFRHDS
243	FP_-K10-S8_180	KTEEISEVYMDAEFRHDS
244	FP_-K10-S8_181	KTEEISEVKADAEFRHDS
245	FP_-K10-S8_182	KTEEISEVKCDAEFRHDS
246	FP_-K10-S8_183	KTEEISEVKDDAEFRHDS
247	FP_-K10-S8_184	KTEEISEVKEDAEFRHDS
248	FP_-K10-S8_185	KTEEISEVKFDAEFRHDS
249	FP_-K10-S8_186	KTEEISEVKGDAEFRHDS
250	FP_-K10-S8_187	KTEEISEVKHDAEFRHDS
251	FP_-K10-S8_188	KTEEISEVKIDAEFRHDS
252	FP_-K10-S8_189	KTEEISEVKKDAEFRHDS
253	FP_-K10-S8_190	KTEEISEVKLDAEFRHDS
254	FP_-K10-S8_191	KTEEISEVKMDAEFRHDS
255	FP_-K10-S8_192	KTEEISEVKNDAEFRHDS
256	FP_-K10-S8_193	KTEEISEVKPDAEFRHDS
257	FP_-K10-S8_194	KTEEISEVKQDAEFRHDS
258	FP_-K10-S8_195	KTEEISEVKRDAEFRHDS
259	FP_-K10-S8_196	KTEEISEVKSDAEFRHDS
260	FP_-K10-S8_197	KTEEISEVKTDAEFRHDS
261	FP_-K10-S8_198	KTEEISEVKVDAEFRHDS
262	FP_-K10-S8_199	KTEEISEVKWDAEFRHDS
263	FP_-K10-S8_200	KTEEISEVKYDAEFRHDS
264	FP_-K10-S8_201	KTEEISEVKMAAEFRHDS
265	FP_-K10-S8_202	KTEEISEVKMCAEFRHDS
266	FP_-K10-S8_203	KTEEISEVKMDAEFRHDS
267	FP_-K10-S8_204	KTEEISEVKMEAEFRHDS
268	FP_-K10-S8_205	KTEEISEVKMFAEFRHDS
269	FP_-K10-S8_206	KTEEISEVKMGAEFRHDS
270	FP_-K10-S8_207	KTEEISEVKMHAEFRHDS
271	FP_-K10-S8_208	KTEEISEVKMIAEFRHDS
272	FP_-K10-S8_209	KTEEISEVKMKAEFRHDS
273	FP_-K10-S8_210	KTEEISEVKMLAEFRHDS
274	FP_-K10-S8_211	KTEEISEVKMMAEFRHDS
275	FP_-K10-S8_212	KTEEISEVKMNAEFRHDS
276	FP_-K10-S8_213	KTEEISEVKMPAEFRHDS
277	FP_-K10-S8_214	KTEEISEVKMQAEFRHDS
278	FP_-K10-S8_215	KTEEISEVKMRAEFRHDS
279	FP_-K10-S8_216	KTEEISEVKMSAEFRHDS
280	FP_-K10-S8_217	KTEEISEVKMTAEFRHDS
281	FP_-K10-S8_218	KTEEISEVKMVAEFRHDS
282	FP_-K10-S8_219	KTEEISEVKMWAEFRHDS
283	FP_-K10-S8_220	KTEEISEVKMYAEFRHDS
284	FP_-K10-S8_221	KTEEISEVKMDAEFRHDS
285	FP_-K10-S8_222	KTEEISEVKMDCEFRHDS
286	FP_-K10-S8_223	KTEEISEVKMDDEFRHDS
287	FP_-K10-S8_224	KTEEISEVKMDEEFRHDS
288	FP_-K10-S8_225	KTEEISEVKMDFEFRHDS
289	FP_-K10-S8_226	KTEEISEVKMDGEFRHDS
290	FP_-K10-S8_227	KTEEISEVKMDHEFRHDS
291	FP_-K10-S8_228	KTEEISEVKMDIEFRHDS
292	FP_-K10-S8_229	KTEEISEVKMDKEFRHDS
293	FP_-K10-S8_230	KTEEISEVKMDLEFRHDS
294	FP_-K10-S8_231	KTEEISEVKMDMEFRHDS
295	FP_-K10-S8_232	KTEEISEVKMDNEFRHDS
296	FP_-K10-S8_233	KTEEISEVKMDPEFRHDS
297	FP_-K10-S8_234	KTEEISEVKMDQEFRHDS
298	FP_-K10-S8_235	KTEEISEVKMDREFRHDS
299	FP_-K10-S8_236	KTEEISEVKMDSEFRHDS
300	FP_-K10-S8_237	KTEEISEVKMDTEFRHDS
301	FP_-K10-S8_238	KTEEISEVKMDVEFRHDS
302	FP_-K10-S8_239	KTEEISEVKMDWEFRHDS
303	FP_-K10-S8_240	KTEEISEVKMDYEFRHDS
304	FP_-K10-S8_241	KTEEISEVKMDAAFRHDS
305	FP_-K10-S8_242	KTEEISEVKMDACFRHDS
306	FP_-K10-S8_243	KTEEISEVKMDADFRHDS
307	FP_-K10-S8_244	KTEEISEVKMDAEFRHDS
308	FP_-K10-S8_245	KTEEISEVKMDAFFRHDS
309	FP_-K10-S8_246	KTEEISEVKMDAGFRHDS
310	FP_-K10-S8_247	KTEEISEVKMDAHFRHDS
311	FP_-K10-S8_248	KTEEISEVKMDAIFRHDS
312	FP_-K10-S8_249	KTEEISEVKMDAKFRHDS
313	FP_-K10-S8_250	KTEEISEVKMDALFRHDS
314	FP_-K10-S8_251	KTEEISEVKMDAMFRHDS
315	FP_-K10-S8_252	KTEEISEVKMDANFRHDS
316	FP_-K10-S8_253	KTEEISEVKMDAPFRHDS
317	FP_-K10-S8_254	KTEEISEVKMDAQFRHDS
318	FP_-K10-S8_255	KTEEISEVKMDARFRHDS
319	FP_-K10-S8_256	KTEEISEVKMDASFRHDS
320	FP_-K10-S8_257	KTEEISEVKMDATFRHDS
321	FP_-K10-S8_258	KTEEISEVKMDAVFRHDS
322	FP_-K10-S8_259	KTEEISEVKMDAWFRHDS
323	FP_-K10-S8_260	KTEEISEVKMDAYFRHDS
324	FP_-K10-S8_261	KTEEISEVKMDAEARHDS
325	FP_-K10-S8_262	KTEEISEVKMDAECRHDS
326	FP_-K10-S8_263	KTEEISEVKMDAEDRHDS
327	FP_-K10-S8_264	KTEEISEVKMDAEERHDS
328	FP_-K10-S8_265	KTEEISEVKMDAEFRHDS
329	FP_-K10-S8_266	KTEEISEVKMDAEGRHDS
330	FP_-K10-S8_267	KTEEISEVKMDAEHRHDS
331	FP_-K10-S8_268	KTEEISEVKMDAEIRHDS
332	FP_-K10-S8_269	KTEEISEVKMDAEKRHDS
333	FP_-K10-S8_270	KTEEISEVKMDAELRHDS
334	FP_-K10-S8_271	KTEEISEVKMDAEMRHDS
335	FP_-K10-S8_272	KTEEISEVKMDAENRHDS
336	FP_-K10-S8_273	KTEEISEVKMDAEPRHDS
337	FP_-K10-S8_274	KTEEISEVKMDAEQRHDS
338	FP_-K10-S8_275	KTEEISEVKMDAERRHDS
339	FP_-K10-S8_276	KTEEISEVKMDAESRHDS
340	FP_-K10-S8_277	KTEEISEVKMDAETRHDS
341	FP_-K10-S8_278	KTEEISEVKMDAEVRHDS
342	FP_-K10-S8_279	KTEEISEVKMDAEWRHDS
343	FP_-K10-S8_280	KTEEISEVKMDAEYRHDS
344	FP_-K10-S8_281	KTEEISEVKMDAEFAHDS
345	FP_-K10-S8_282	KTEEISEVKMDAEFCHDS
346	FP_-K10-S8_283	KTEEISEVKMDAEFDHDS
347	FP_-K10-S8_284	KTEEISEVKMDAEFEHDS
348	FP_-K10-S8_285	KTEEISEVKMDAEFFHDS
349	FP_-K10-S8_286	KTEEISEVKMDAEFGHDS
350	FP_-K10-S8_287	KTEEISEVKMDAEFHHDS
351	FP_-K10-S8_288	KTEEISEVKMDAEFIHDS
352	FP_-K10-S8_289	KTEEISEVKMDAEFKHDS
353	FP_-K10-S8_290	KTEEISEVKMDAEFLHDS
354	FP_-K10-S8_291	KTEEISEVKMDAEFMHDS
355	FP_-K10-S8_292	KTEEISEVKMDAEFNHDS
356	FP_-K10-S8_293	KTEEISEVKMDAEFPHDS
357	FP_-K10-S8_294	KTEEISEVKMDAEFQHDS
358	FP_-K10-S8_295	KTEEISEVKMDAEFRHDS
359	FP_-K10-S8_296	KTEEISEVKMDAEFSHDS
360	FP_-K10-S8_297	KTEEISEVKMDAEFTHDS
361	FP_-K10-S8_298	KTEEISEVKMDAEFVHDS
362	FP_-K10-S8_299	KTEEISEVKMDAEFWHDS
363	FP_-K10-S8_300	KTEEISEVKMDAEFYHDS
364	FP_-K10-S8_301	KTEEISEVKMDAEFRADS
365	FP_-K10-S8_302	KTEEISEVKMDAEFRCDS
366	FP_-K10-S8_303	KTEEISEVKMDAEFRDDS
367	FP_-K10-S8_304	KTEEISEVKMDAEFREDS
368	FP_-K10-S8_305	KTEEISEVKMDAEFRFDS
369	FP_-K10-S8_306	KTEEISEVKMDAEFRGDS
370	FP_-K10-S8_307	KTEEISEVKMDAEFRHDS
371	FP_-K10-S8_308	KTEEISEVKMDAEFRIDS
372	FP_-K10-S8_309	KTEEISEVKMDAEFRKDS
373	FP_-K10-S8_310	KTEEISEVKMDAEFRLDS
374	FP_-K10-S8_311	KTEEISEVKMDAEFRMDS
375	FP_-K10-S8_312	KTEEISEVKMDAEFRNDS
376	FP_-K10-S8_313	KTEEISEVKMDAEFRPDS
377	FP_-K10-S8_314	KTEEISEVKMDAEFRQDS
378	FP_-K10-S8_315	KTEEISEVKMDAEFRRDS
379	FP_-K10-S8_316	KTEEISEVKMDAEFRSDS
380	FP_-K10-S8_317	KTEEISEVKMDAEFRTDS
381	FP_-K10-S8_318	KTEEISEVKMDAEFRVDS
382	FP_-K10-S8_319	KTEEISEVKMDAEFRWDS
383	FP_-K10-S8_320	KTEEISEVKMDAEFRYDS
384	FP_-K10-S8_321	KTEEISEVKMDAEFRHAS
385	FP_-K10-S8_322	KTEEISEVKMDAEFRHCS
386	FP_-K10-S8_323	KTEEISEVKMDAEFRHDS
387	FP_-K10-S8_324	KTEEISEVKMDAEFRHES
388	FP_-K10-S8_325	KTEEISEVKMDAEFRHFS
389	FP_-K10-S8_326	KTEEISEVKMDAEFRHGS
390	FP_-K10-S8_327	KTEEISEVKMDAEFRHHS
391	FP_-K10-S8_328	KTEEISEVKMDAEFRHIS
392	FP_-K10-S8_329	KTEEISEVKMDAEFRHKS
393	FP_-K10-S8_330	KTEEISEVKMDAEFRHLS
394	FP_-K10-S8_331	KTEEISEVKMDAEFRHMS
395	FP_-K10-S8_332	KTEEISEVKMDAEFRHNS
396	FP_-K10-S8_333	KTEEISEVKMDAEFRHPS
397	FP_-K10-S8_334	KTEEISEVKMDAEFRHQS
398	FP_-K10-S8_335	KTEEISEVKMDAEFRHRS
399	FP_-K10-S8_336	KTEEISEVKMDAEFRHSS
400	FP_-K10-S8_337	KTEEISEVKMDAEFRHTS
401	FP_-K10-S8_338	KTEEISEVKMDAEFRHVS
402	FP_-K10-S8_339	KTEEISEVKMDAEFRHWS
403	FP_-K10-S8_340	KTEEISEVKMDAEFRHYS
404	FP_-K10-S8_341	KTEEISEVKMDAEFRHDA
405	FP_-K10-S8_342	KTEEISEVKMDAEFRHDC
406	FP_-K10-S8_343	KTEEISEVKMDAEFRHDD
407	FP_-K10-S8_344	KTEEISEVKMDAEFRHDE
408	FP_-K10-S8_345	KTEEISEVKMDAEFRHDF
409	FP_-K10-S8_346	KTEEISEVKMDAEFRHDG
410	FP_-K10-S8_347	KTEEISEVKMDAEFRHDH
411	FP_-K10-S8_348	KTEEISEVKMDAEFRHDI
412	FP_-K10-S8_349	KTEEISEVKMDAEFRHDK
413	FP_-K10-S8_350	KTEEISEVKMDAEFRHDL
414	FP_-K10-S8_351	KTEEISEVKMDAEFRHDM
415	FP_-K10-S8_352	KTEEISEVKMDAEFRHDN
416	FP_-K10-S8_353	KTEEISEVKMDAEFRHDP
417	FP_-K10-S8_354	KTEEISEVKMDAEFRHDQ
418	FP_-K10-S8_355	KTEEISEVKMDAEFRHDR
419	FP_-K10-S8_356	KTEEISEVKMDAEFRHDS
420	FP_-K10-S8_357	KTEEISEVKMDAEFRHDT
421	FP_-K10-S8_358	KTEEISEVKMDAEFRHDV
422	FP_-K10-S8_359	KTEEISEVKMDAEFRHDW
423	FP_-K10-S8_360	KTEEISEVKMDAEFRHDY
424	FP_-3V-Q15_001	AKMDAEFRHDSGYEVHHQ
425	FP_-3V-Q15_002	CKMDAEFRHDSGYEVHHQ
426	FP_-3V-Q15_003	DKMDAEFRHDSGYEVHHQ
427	FP_-3V-Q15_004	EKMDAEFRHDSGYEVHHQ
428	FP_-3V-Q15_005	FKMDAEFRHDSGYEVHHQ
429	FP_-3V-Q15_006	GKMDAEFRHDSGYEVHHQ
430	FP_-3V-Q15_007	HKMDAEFRHDSGYEVHHQ
431	FP_-3V-Q15_008	IKMDAEFRHDSGYEVHHQ
432	FP_-3V-Q15_009	KKMDAEFRHDSGYEVHHQ
433	FP_-3V-Q15_010	LKMDAEFRHDSGYEVHHQ
434	FP_-3V-Q15_011	MKMDAEFRHDSGYEVHHQ
435	FP_-3V-Q15_012	NKMDAEFRHDSGYEVHHQ
436	FP_-3V-Q15_013	PKMDAEFRHDSGYEVHHQ
437	FP_-3V-Q15_014	QKMDAEFRHDSGYEVHHQ
438	FP_-3V-Q15_015	RKMDAEFRHDSGYEVHHQ
439	FP_-3V-Q15_016	SKMDAEFRHDSGYEVHHQ
440	FP_-3V-Q15_017	TKMDAEFRHDSGYEVHHQ
441	FP_-3V-Q15_018	VKMDAEFRHDSGYEVHHQ
442	FP_-3V-Q15_019	WKMDAEFRHDSGYEVHHQ
443	FP_-3V-Q15_020	YKMDAEFRHDSGYEVHHQ
444	FP_-3V-Q15_021	VAMDAEFRHDSGYEVHHQ
445	FP_-3V-Q15_022	VCMDAEFRHDSGYEVHHQ
446	FP_-3V-Q15_023	VDMDAEFRHDSGYEVHHQ
447	FP_-3V-Q15_024	VEMDAEFRHDSGYEVHHQ
448	FP_-3V-Q15_025	VFMDAEFRHDSGYEVHHQ
449	FP_-3V-Q15_026	VGMDAEFRHDSGYEVHHQ
450	FP_-3V-Q15_027	VHMDAEFRHDSGYEVHHQ
451	FP_-3V-Q15_028	VIMDAEFRHDSGYEVHHQ
452	FP_-3V-Q15_029	VKMDAEFRHDSGYEVHHQ
453	FP_-3V-Q15_030	VLMDAEFRHDSGYEVHHQ
454	FP_-3V-Q15_031	VMMDAEFRHDSGYEVHHQ
455	FP_-3V-Q15_032	VNMDAEFRHDSGYEVHHQ
456	FP_-3V-Q15_033	VPMDAEFRHDSGYEVHHQ
457	FP_-3V-Q15_034	VQMDAEFRHDSGYEVHHQ
458	FP_-3V-Q15_035	VRMDAEFRHDSGYEVHHQ
459	FP_-3V-Q15_036	VSMDAEFRHDSGYEVHHQ
460	FP_-3V-Q15_037	VTMDAEFRHDSGYEVHHQ
461	FP_-3V-Q15_038	VVMDAEFRHDSGYEVHHQ
462	FP_-3V-Q15_039	VWMDAEFRHDSGYEVHHQ
463	FP_-3V-Q15_040	VYMDAEFRHDSGYEVHHQ
464	FP_-3V-Q15_041	VKADAEFRHDSGYEVHHQ
465	FP_-3V-Q15_042	VKCDAEFRHDSGYEVHHQ
466	FP_-3V-Q15_043	VKDDAEFRHDSGYEVHHQ
467	FP_-3V-Q15_044	VKEDAEFRHDSGYEVHHQ
468	FP_-3V-Q15_045	VKFDAEFRHDSGYEVHHQ
469	FP_-3V-Q15_046	VKGDAEFRHDSGYEVHHQ
470	FP_-3V-Q15_047	VKHDAEFRHDSGYEVHHQ
471	FP_-3V-Q15_048	VKIDAEFRHDSGYEVHHQ
472	FP_-3V-Q15_049	VKKDAEFRHDSGYEVHHQ
473	FP_-3V-Q15_050	VKLDAEFRHDSGYEVHHQ
474	FP_-3V-Q15_051	VKMDAEFRHDSGYEVHHQ
475	FP_-3V-Q15_052	VKNDAEFRHDSGYEVHHQ
476	FP_-3V-Q15_053	VKPDAEFRHDSGYEVHHQ
477	FP_-3V-Q15_054	VKQDAEFRHDSGYEVHHQ
478	FP_-3V-Q15_055	VKRDAEFRHDSGYEVHHQ
479	FP_-3V-Q15_056	VKSDAEFRHDSGYEVHHQ
480	FP_-3V-Q15_057	VKTDAEFRHDSGYEVHHQ
481	FP_-3V-Q15_058	VKVDAEFRHDSGYEVHHQ
482	FP_-3V-Q15_059	VKWDAEFRHDSGYEVHHQ
483	FP_-3V-Q15_060	VKYDAEFRHDSGYEVHHQ
484	FP_-3V-Q15_061	VKMAAEFRHDSGYEVHHQ
485	FP_-3V-Q15_062	VKMCAEFRHDSGYEVHHQ
486	FP_-3V-Q15_063	VKMDAEFRHDSGYEVHHQ
487	FP_-3V-Q15_064	VKMEAEFRHDSGYEVHHQ
488	FP_-3V-Q15_065	VKMFAEFRHDSGYEVHHQ
489	FP_-3V-Q15_066	VKMGAEFRHDSGYEVHHQ
490	FP_-3V-Q15_067	VKMHAEFRHDSGYEVHHQ
491	FP_-3V-Q15_068	VKMIAEFRHDSGYEVHHQ
492	FP_-3V-Q15_069	VKMKAEFRHDSGYEVHHQ
493	FP_-3V-Q15_070	VKMLAEFRHDSGYEVHHQ
494	FP_-3V-Q15_071	VKMMAEFRHDSGYEVHHQ
495	FP_-3V-Q15_072	VKMNAEFRHDSGYEVHHQ
496	FP_-3V-Q15_073	VKMPAEFRHDSGYEVHHQ
497	FP_-3V-Q15_074	VKMQAEFRHDSGYEVHHQ
498	FP_-3V-Q15_075	VKMRAEFRHDSGYEVHHQ
499	FP_-3V-Q15_076	VKMSAEFRHDSGYEVHHQ
500	FP_-3V-Q15_077	VKMTAEFRHDSGYEVHHQ
501	FP_-3V-Q15_078	VKMVAEFRHDSGYEVHHQ
502	FP_-3V-Q15_079	VKMWAEFRHDSGYEVHHQ
503	FP_-3V-Q15_080	VKMYAEFRHDSGYEVHHQ
504	FP_-3V-Q15_081	VKMDAEFRHDSGYEVHHQ
505	FP_-3V-Q15_082	VKMDCEFRHDSGYEVHHQ
506	FP_-3V-Q15_083	VKMDDEFRHDSGYEVHHQ
507	FP_-3V-Q15_084	VKMDEEFRHDSGYEVHHQ
508	FP_-3V-Q15_085	VKMDFEFRHDSGYEVHHQ
509	FP_-3V-Q15_086	VKMDGEFRHDSGYEVHHQ
510	FP_-3V-Q15_087	VKMDHEFRHDSGYEVHHQ
511	FP_-3V-Q15_088	VKMDIEFRHDSGYEVHHQ
512	FP_-3V-Q15_089	VKMDKEFRHDSGYEVHHQ
513	FP_-3V-Q15_090	VKMDLEFRHDSGYEVHHQ
514	FP_-3V-Q15_091	VKMDMEFRHDSGYEVHHQ
515	FP_-3V-Q15_092	VKMDNEFRHDSGYEVHHQ
516	FP_-3V-Q15_093	VKMDPEFRHDSGYEVHHQ
517	FP_-3V-Q15_094	VKMDQEFRHDSGYEVHHQ
518	FP_-3V-Q15_095	VKMDREFRHDSGYEVHHQ
519	FP_-3V-Q15_096	VKMDSEFRHDSGYEVHHQ
520	FP_-3V-Q15_097	VKMDTEFRHDSGYEVHHQ
521	FP_-3V-Q15_098	VKMDVEFRHDSGYEVHHQ
522	FP_-3V-Q15_099	VKMDWEFRHDSGYEVHHQ
523	FP_-3V-Q15_100	VKMDYEFRHDSGYEVHHQ
524	FP_-3V-Q15_101	VKMDAAFRHDSGYEVHHQ
525	FP_-3V-Q15_102	VKMDACFRHDSGYEVHHQ
526	FP_-3V-Q15_103	VKMDADFRHDSGYEVHHQ
527	FP_-3V-Q15_104	VKMDAEFRHDSGYEVHHQ
528	FP_-3V-Q15_105	VKMDAFFRHDSGYEVHHQ
529	FP_-3V-Q15_106	VKMDAGFRHDSGYEVHHQ
530	FP_-3V-Q15_107	VKMDAHFRHDSGYEVHHQ
531	FP_-3V-Q15_108	VKMDAIFRHDSGYEVHHQ
532	FP_-3V-Q15_109	VKMDAKFRHDSGYEVHHQ
533	FP_-3V-Q15_110	VKMDALFRHDSGYEVHHQ
534	FP_-3V-Q15_111	VKMDAMFRHDSGYEVHHQ
535	FP_-3V-Q15_112	VKMDANFRHDSGYEVHHQ
536	FP_-3V-Q15_113	VKMDAPFRHDSGYEVHHQ
537	FP_-3V-Q15_114	VKMDAQFRHDSGYEVHHQ
538	FP_-3V-Q15_115	VKMDARFRHDSGYEVHHQ
539	FP_-3V-Q15_116	VKMDASFRHDSGYEVHHQ
540	FP_-3V-Q15_117	VKMDATFRHDSGYEVHHQ
541	FP_-3V-Q15_118	VKMDAVFRHDSGYEVHHQ
542	FP_-3V-Q15_119	VKMDAWFRHDSGYEVHHQ
543	FP_-3V-Q15_120	VKMDAYFRHDSGYEVHHQ
544	FP_-3V-Q15_121	VKMDAEARHDSGYEVHHQ
545	FP_-3V-Q15_122	VKMDAECRHDSGYEVHHQ
546	FP_-3V-Q15_123	VKMDAEDRHDSGYEVHHQ
547	FP_-3V-Q15_124	VKMDAEERHDSGYEVHHQ
548	FP_-3V-Q15_125	VKMDAEFRHDSGYEVHHQ
549	FP_-3V-Q15_126	VKMDAEGRHDSGYEVHHQ
550	FP_-3V-Q15_127	VKMDAEHRHDSGYEVHHQ
551	FP_-3V-Q15_128	VKMDAEIRHDSGYEVHHQ
552	FP_-3V-Q15_129	VKMDAEKRHDSGYEVHHQ
553	FP_-3V-Q15_130	VKMDAELRHDSGYEVHHQ
554	FP_-3V-Q15_131	VKMDAEMRHDSGYEVHHQ
555	FP_-3V-Q15_132	VKMDAENRHDSGYEVHHQ
556	FP_-3V-Q15_133	VKMDAEPRHDSGYEVHHQ
557	FP_-3V-Q15_134	VKMDAEQRHDSGYEVHHQ
558	FP_-3V-Q15_135	VKMDAERRHDSGYEVHHQ
559	FP_-3V-Q15_136	VKMDAESRHDSGYEVHHQ
560	FP_-3V-Q15_137	VKMDAETRHDSGYEVHHQ
561	FP_-3V-Q15_138	VKMDAEVRHDSGYEVHHQ
562	FP_-3V-Q15_139	VKMDAEWRHDSGYEVHHQ
563	FP_-3V-Q15_140	VKMDAEYRHDSGYEVHHQ
564	FP_-3V-Q15_141	VKMDAEFAHDSGYEVHHQ
565	FP_-3V-Q15_142	VKMDAEFCHDSGYEVHHQ
566	FP_-3V-Q15_143	VKMDAEFDHDSGYEVHHQ
567	FP_-3V-Q15_144	VKMDAEFEHDSGYEVHHQ
568	FP_-3V-Q15_145	VKMDAEFFHDSGYEVHHQ
569	FP_-3V-Q15_146	VKMDAEFGHDSGYEVHHQ
570	FP_-3V-Q15_147	VKMDAEFHHDSGYEVHHQ
571	FP_-3V-Q15_148	VKMDAEFIHDSGYEVHHQ
572	FP_-3V-Q15_149	VKMDAEFKHDSGYEVHHQ
573	FP_-3V-Q15_150	VKMDAEFLHDSGYEVHHQ
574	FP_-3V-Q15_151	VKMDAEFMHDSGYEVHHQ
575	FP_-3V-Q15_152	VKMDAEFNHDSGYEVHHQ
576	FP_-3V-Q15_153	VKMDAEFPHDSGYEVHHQ
577	FP_-3V-Q15_154	VKMDAEFQHDSGYEVHHQ
578	FP_-3V-Q15_155	VKMDAEFRHDSGYEVHHQ
579	FP_-3V-Q15_156	VKMDAEFSHDSGYEVHHQ
580	FP_-3V-Q15_157	VKMDAEFTHDSGYEVHHQ
581	FP_-3V-Q15_158	VKMDAEFVHDSGYEVHHQ
582	FP_-3V-Q15_159	VKMDAEFWHDSGYEVHHQ
583	FP_-3V-Q15_160	VKMDAEFYHDSGYEVHHQ
584	FP_-3V-Q15_161	VKMDAEFRADSGYEVHHQ
585	FP_-3V-Q15_162	VKMDAEFRCDSGYEVHHQ
586	FP_-3V-Q15_163	VKMDAEFRDDSGYEVHHQ
587	FP_-3V-Q15_164	VKMDAEFREDSGYEVHHQ
588	FP_-3V-Q15_165	VKMDAEFRFDSGYEVHHQ
589	FP_-3V-Q15_166	VKMDAEFRGDSGYEVHHQ
590	FP_-3V-Q15_167	VKMDAEFRHDSGYEVHHQ
591	FP_-3V-Q15_168	VKMDAEFRIDSGYEVHHQ
592	FP_-3V-Q15_169	VKMDAEFRKDSGYEVHHQ
593	FP_-3V-Q15_170	VKMDAEFRLDSGYEVHHQ
594	FP_-3V-Q15_171	VKMDAEFRMDSGYEVHHQ
595	FP_-3V-Q15_172	VKMDAEFRNDSGYEVHHQ
596	FP_-3V-Q15_173	VKMDAEFRPDSGYEVHHQ
597	FP_-3V-Q15_174	VKMDAEFRQDSGYEVHHQ
598	FP_-3V-Q15_175	VKMDAEFRRDSGYEVHHQ
599	FP_-3V-Q15_176	VKMDAEFRSDSGYEVHHQ
600	FP_-3V-Q15_177	VKMDAEFRTDSGYEVHHQ
601	FP_-3V-Q15_178	VKMDAEFRVDSGYEVHHQ
602	FP_-3V-Q15_179	VKMDAEFRWDSGYEVHHQ
603	FP_-3V-Q15_180	VKMDAEFRYDSGYEVHHQ
604	FP_-3V-Q15_181	VKMDAEFRHASGYEVHHQ
605	FP_-3V-Q15_182	VKMDAEFRHCSGYEVHHQ
606	FP_-3V-Q15_183	VKMDAEFRHDSGYEVHHQ
607	FP_-3V-Q15_184	VKMDAEFRHESGYEVHHQ
608	FP_-3V-Q15_185	VKMDAEFRHFSGYEVHHQ
609	FP_-3V-Q15_186	VKMDAEFRHGSGYEVHHQ
610	FP_-3V-Q15_187	VKMDAEFRHHSGYEVHHQ
611	FP_-3V-Q15_188	VKMDAEFRHISGYEVHHQ
612	FP_-3V-Q15_189	VKMDAEFRHKSGYEVHHQ
613	FP_-3V-Q15_190	VKMDAEFRHLSGYEVHHQ
614	FP_-3V-Q15_191	VKMDAEFRHMSGYEVHHQ
615	FP_-3V-Q15_192	VKMDAEFRHNSGYEVHHQ
616	FP_-3V-Q15_193	VKMDAEFRHPSGYEVHHQ
617	FP_-3V-Q15_194	VKMDAEFRHQSGYEVHHQ
618	FP_-3V-Q15_195	VKMDAEFRHRSGYEVHHQ
619	FP_-3V-Q15_196	VKMDAEFRHSSGYEVHHQ
620	FP_-3V-Q15_197	VKMDAEFRHTSGYEVHHQ
621	FP_-3V-Q15_198	VKMDAEFRHVSGYEVHHQ
622	FP_-3V-Q15_199	VKMDAEFRHWSGYEVHHQ
623	FP_-3V-Q15_200	VKMDAEFRHYSGYEVHHQ
624	FP_-3V-Q15_201	VKMDAEFRHDAGYEVHHQ
625	FP_-3V-Q15_202	VKMDAEFRHDCGYEVHHQ
626	FP_-3V-Q15_203	VKMDAEFRHDDGYEVHHQ
627	FP_-3V-Q15_204	VKMDAEFRHDEGYEVHHQ
628	FP_-3V-Q15_205	VKMDAEFRHDFGYEVHHQ
629	FP_-3V-Q15_206	VKMDAEFRHDGGYEVHHQ
630	FP_-3V-Q15_207	VKMDAEFRHDHGYEVHHQ
631	FP_-3V-Q15_208	VKMDAEFRHDIGYEVHHQ
632	FP_-3V-Q15_209	VKMDAEFRHDKGYEVHHQ
633	FP_-3V-Q15_210	VKMDAEFRHDLGYEVHHQ
634	FP_-3V-Q15_211	VKMDAEFRHDMGYEVHHQ
635	FP_-3V-Q15_212	VKMDAEFRHDNGYEVHHQ
636	FP_-3V-Q15_213	VKMDAEFRHDPGYEVHHQ
637	FP_-3V-Q15_214	VKMDAEFRHDQGYEVHHQ
638	FP_-3V-Q15_215	VKMDAEFRHDRGYEVHHQ
639	FP_-3V-Q15_216	VKMDAEFRHDSGYEVHHQ
640	FP_-3V-Q15_217	VKMDAEFRHDTGYEVHHQ
641	FP_-3V-Q15_218	VKMDAEFRHDVGYEVHHQ
642	FP_-3V-Q15_219	VKMDAEFRHDWGYEVHHQ
643	FP_-3V-Q15_220	VKMDAEFRHDYGYEVHHQ
644	FP_-3V-Q15_221	VKMDAEFRHDSAYEVHHQ
645	FP_-3V-Q15_222	VKMDAEFRHDSCYEVHHQ
646	FP_-3V-Q15_223	VKMDAEFRHDSDYEVHHQ
647	FP_-3V-Q15_224	VKMDAEFRHDSEYEVHHQ
648	FP_-3V-Q15_225	VKMDAEFRHDSFYEVHHQ
649	FP_-3V-Q15_226	VKMDAEFRHDSGYEVHHQ
650	FP_-3V-Q15_227	VKMDAEFRHDSHYEVHHQ
651	FP_-3V-Q15_228	VKMDAEFRHDSIYEVHHQ
652	FP_-3V-Q15_229	VKMDAEFRHDSKYEVHHQ
653	FP_-3V-Q15_230	VKMDAEFRHDSLYEVHHQ
654	FP_-3V-Q15_231	VKMDAEFRHDSMYEVHHQ
655	FP_-3V-Q15_232	VKMDAEFRHDSNYEVHHQ
656	FP_-3V-Q15_233	VKMDAEFRHDSPYEVHHQ
657	FP_-3V-Q15_234	VKMDAEFRHDSQYEVHHQ
658	FP_-3V-Q15_235	VKMDAEFRHDSRYEVHHQ
659	FP_-3V-Q15_236	VKMDAEFRHDSSYEVHHQ
660	FP_-3V-Q15_237	VKMDAEFRHDSTYEVHHQ
661	FP_-3V-Q15_238	VKMDAEFRHDSVYEVHHQ
662	FP_-3V-Q15_239	VKMDAEFRHDSWYEVHHQ
663	FP_-3V-Q15_240	VKMDAEFRHDSYYEVHHQ
664	FP_-3V-Q15_241	VKMDAEFRHDSGAEVHHQ
665	FP_-3V-Q15_242	VKMDAEFRHDSGCEVHHQ
666	FP_-3V-Q15_243	VKMDAEFRHDSGDEVHHQ
667	FP_-3V-Q15_244	VKMDAEFRHDSGEEVHHQ
668	FP_-3V-Q15_245	VKMDAEFRHDSGFEVHHQ
669	FP_-3V-Q15_246	VKMDAEFRHDSGGEVHHQ
670	FP_-3V-Q15_247	VKMDAEFRHDSGHEVHHQ
671	FP_-3V-Q15_248	VKMDAEFRHDSGIEVHHQ
672	FP_-3V-Q15_249	VKMDAEFRHDSGKEVHHQ
673	FP_-3V-Q15_250	VKMDAEFRHDSGLEVHHQ
674	FP_-3V-Q15_251	VKMDAEFRHDSGMEVHHQ
675	FP_-3V-Q15_252	VKMDAEFRHDSGNEVHHQ
676	FP_-3V-Q15_253	VKMDAEFRHDSGPEVHHQ
677	FP_-3V-Q15_254	VKMDAEFRHDSGQEVHHQ
678	FP_-3V-Q15_255	VKMDAEFRHDSGREVHHQ
679	FP_-3V-Q15_256	VKMDAEFRHDSGSEVHHQ
680	FP_-3V-Q15_257	VKMDAEFRHDSGTEVHHQ
681	FP_-3V-Q15_258	VKMDAEFRHDSGVEVHHQ
682	FP_-3V-Q15_259	VKMDAEFRHDSGWEVHHQ
683	FP_-3V-Q15_260	VKMDAEFRHDSGYEVHHQ
684	FP_-3V-Q15_261	VKMDAEFRHDSGYAVHHQ
685	FP_-3V-Q15_262	VKMDAEFRHDSGYCVHHQ
686	FP_-3V-Q15_263	VKMDAEFRHDSGYDVHHQ
687	FP_-3V-Q15_264	VKMDAEFRHDSGYEVHHQ
688	FP_-3V-Q15_265	VKMDAEFRHDSGYFVHHQ
689	FP_-3V-Q15_266	VKMDAEFRHDSGYGVHHQ
690	FP_-3V-Q15_267	VKMDAEFRHDSGYHVHHQ
691	FP_-3V-Q15_268	VKMDAEFRHDSGYIVHHQ
692	FP_-3V-Q15_269	VKMDAEFRHDSGYKVHHQ
693	FP_-3V-Q15_270	VKMDAEFRHDSGYLVHHQ
694	FP_-3V-Q15_271	VKMDAEFRHDSGYMVHHQ
695	FP_-3V-Q15_272	VKMDAEFRHDSGYNVHHQ
696	FP_-3V-Q15_273	VKMDAEFRHDSGYPVHHQ
697	FP_-3V-Q15_274	VKMDAEFRHDSGYQVHHQ
698	FP_-3V-Q15_275	VKMDAEFRHDSGYRVHHQ
699	FP_-3V-Q15_276	VKMDAEFRHDSGYSVHHQ
700	FP_-3V-Q15_277	VKMDAEFRHDSGYTVHHQ
701	FP_-3V-Q15_278	VKMDAEFRHDSGYVVHHQ
702	FP_-3V-Q15_279	VKMDAEFRHDSGYWVHHQ
703	FP_-3V-Q15_280	VKMDAEFRHDSGYYVHHQ
704	FP_-3V-Q15_281	VKMDAEFRHDSGYEAHHQ
705	FP_-3V-Q15_282	VKMDAEFRHDSGYECHHQ
706	FP_-3V-Q15_283	VKMDAEFRHDSGYEDHHQ
707	FP_-3V-Q15_284	VKMDAEFRHDSGYEEHHQ
708	FP_-3V-Q15_285	VKMDAEFRHDSGYEFHHQ
709	FP_-3V-Q15_286	VKMDAEFRHDSGYEGHHQ
710	FP_-3V-Q15_287	VKMDAEFRHDSGYEHHHQ
711	FP_-3V-Q15_288	VKMDAEFRHDSGYEIHHQ
712	FP_-3V-Q15_289	VKMDAEFRHDSGYEKHHQ
713	FP_-3V-Q15_290	VKMDAEFRHDSGYELHHQ
714	FP_-3V-Q15_291	VKMDAEFRHDSGYEMHHQ
715	FP_-3V-Q15_292	VKMDAEFRHDSGYENHHQ
716	FP_-3V-Q15_293	VKMDAEFRHDSGYEPHHQ
717	FP_-3V-Q15_294	VKMDAEFRHDSGYEQHHQ
718	FP_-3V-Q15_295	VKMDAEFRHDSGYERHHQ
719	FP_-3V-Q15_296	VKMDAEFRHDSGYESHHQ
720	FP_-3V-Q15_297	VKMDAEFRHDSGYETHHQ
721	FP_-3V-Q15_298	VKMDAEFRHDSGYEVHHQ
722	FP_-3V-Q15_299	VKMDAEFRHDSGYEWHHQ
723	FP_-3V-Q15_300	VKMDAEFRHDSGYEYHHQ
724	FP_-3V-Q15_301	VKMDAEFRHDSGYEVAHQ
725	FP_-3V-Q15_302	VKMDAEFRHDSGYEVCHQ
726	FP_-3V-Q15_303	VKMDAEFRHDSGYEVDHQ
727	FP_-3V-Q15_304	VKMDAEFRHDSGYEVEHQ
728	FP_-3V-Q15_305	VKMDAEFRHDSGYEVFHQ
729	FP_-3V-Q15_306	VKMDAEFRHDSGYEVGHQ
730	FP_-3V-Q15_307	VKMDAEFRHDSGYEVHHQ
731	FP_-3V-Q15_308	VKMDAEFRHDSGYEVIHQ
732	FP_-3V-Q15_309	VKMDAEFRHDSGYEVKHQ
733	FP_-3V-Q15_310	VKMDAEFRHDSGYEVLHQ
734	FP_-3V-Q15_311	VKMDAEFRHDSGYEVMHQ
735	FP_-3V-Q15_312	VKMDAEFRHDSGYEVNHQ
736	FP_-3V-Q15_313	VKMDAEFRHDSGYEVPHQ
737	FP_-3V-Q15_314	VKMDAEFRHDSGYEVQHQ
738	FP_-3V-Q15_315	VKMDAEFRHDSGYEVRHQ
739	FP_-3V-Q15_316	VKMDAEFRHDSGYEVSHQ
740	FP_-3V-Q15_317	VKMDAEFRHDSGYEVTHQ
741	FP_-3V-Q15_318	VKMDAEFRHDSGYEVVHQ
742	FP_-3V-Q15_319	VKMDAEFRHDSGYEVWHQ
743	FP_-3V-Q15_320	VKMDAEFRHDSGYEVYHQ
744	FP_-3V-Q15_321	VKMDAEFRHDSGYEVHAQ
745	FP_-3V-Q15_322	VKMDAEFRHDSGYEVHCQ
746	FP_-3V-Q15_323	VKMDAEFRHDSGYEVHDQ
747	FP_-3V-Q15_324	VKMDAEFRHDSGYEVHEQ
748	FP_-3V-Q15_325	VKMDAEFRHDSGYEVHFQ
749	FP_-3V-Q15_326	VKMDAEFRHDSGYEVHGQ
750	FP_-3V-Q15_327	VKMDAEFRHDSGYEVHHQ
751	FP_-3V-Q15_328	VKMDAEFRHDSGYEVHIQ
752	FP_-3V-Q15_329	VKMDAEFRHDSGYEVHKQ
753	FP_-3V-Q15_330	VKMDAEFRHDSGYEVHLQ
754	FP_-3V-Q15_331	VKMDAEFRHDSGYEVHMQ
755	FP_-3V-Q15_332	VKMDAEFRHDSGYEVHNQ
756	FP_-3V-Q15_333	VKMDAEFRHDSGYEVHPQ
757	FP_-3V-Q15_334	VKMDAEFRHDSGYEVHQQ
758	FP_-3V-Q15_335	VKMDAEFRHDSGYEVHRQ
759	FP_-3V-Q15_336	VKMDAEFRHDSGYEVHSQ
760	FP_-3V-Q15_337	VKMDAEFRHDSGYEVHTQ
761	FP_-3V-Q15_338	VKMDAEFRHDSGYEVHVQ
762	FP_-3V-Q15_339	VKMDAEFRHDSGYEVHWQ
763	FP_-3V-Q15_340	VKMDAEFRHDSGYEVHYQ
764	FP_-3V-Q15_341	VKMDAEFRHDSGYEVHHA
765	FP_-3V-Q15_342	VKMDAEFRHDSGYEVHHC
766	FP_-3V-Q15_343	VKMDAEFRHDSGYEVHHD
767	FP_-3V-Q15_344	VKMDAEFRHDSGYEVHHE
768	FP_-3V-Q15_345	VKMDAEFRHDSGYEVHHF
769	FP_-3V-Q15_346	VKMDAEFRHDSGYEVHHG
770	FP_-3V-Q15_347	VKMDAEFRHDSGYEVHHH
771	FP_-3V-Q15_348	VKMDAEFRHDSGYEVHHI
772	FP_-3V-Q15_349	VKMDAEFRHDSGYEVHHK
773	FP_-3V-Q15_350	VKMDAEFRHDSGYEVHHL
774	FP_-3V-Q15_351	VKMDAEFRHDSGYEVHHM
775	FP_-3V-Q15_352	VKMDAEFRHDSGYEVHHN
776	FP_-3V-Q15_353	VKMDAEFRHDSGYEVHHP
777	FP_-3V-Q15_354	VKMDAEFRHDSGYEVHHQ
778	FP_-3V-Q15_355	VKMDAEFRHDSGYEVHHR
779	FP_-3V-Q15_356	VKMDAEFRHDSGYEVHHS
780	FP_-3V-Q15_357	VKMDAEFRHDSGYEVHHT
781	FP_-3V-Q15_358	VKMDAEFRHDSGYEVHHV
782	FP_-3V-Q15_359	VKMDAEFRHDSGYEVHHW
783	FP_-3V-Q15_360	VKMDAEFRHDSGYEVHHY
784	FP_D1-V18_001	AAEFRHDSGYEVHHQKLV
785	FP_D1-V18_002	CAEFRHDSGYEVHHQKLV
786	FP_D1-V18_003	DAEFRHDSGYEVHHQKLV
787	FP_D1-V18_004	EAEFRHDSGYEVHHQKLV
788	FP_D1-V18_005	FAEFRHDSGYEVHHQKLV
789	FP_D1-V18_006	GAEFRHDSGYEVHHQKLV
790	FP_D1-V18_007	HAEFRHDSGYEVHHQKLV
791	FP_D1-V18_008	IAEFRHDSGYEVHHQKLV
792	FP_D1-V18_009	KAEFRHDSGYEVHHQKLV
793	FP_D1-V18_010	LAEFRHDSGYEVHHQKLV
794	FP_D1-V18_011	MAEFRHDSGYEVHHQKLV
795	FP_D1-V18_012	NAEFRHDSGYEVHHQKLV
796	FP_D1-V18_013	PAEFRHDSGYEVHHQKLV
797	FP_D1-V18_014	QAEFRHDSGYEVHHQKLV
798	FP_D1-V18_015	RAEFRHDSGYEVHHQKLV
799	FP_D1-V18_016	SAEFRHDSGYEVHHQKLV
800	FP_D1-V18_017	TAEFRHDSGYEVHHQKLV
801	FP_D1-V18_018	VAEFRHDSGYEVHHQKLV
802	FP_D1-V18_019	WAEFRHDSGYEVHHQKLV
803	FP_D1-V18_020	YAEFRHDSGYEVHHQKLV
804	FP_D1-V18_021	DAEFRHDSGYEVHHQKLV
805	FP_D1-V18_022	DCEFRHDSGYEVHHQKLV
806	FP_D1-V18_023	DDEFRHDSGYEVHHQKLV
807	FP_D1-V18_024	DEEFRHDSGYEVHHQKLV
808	FP_D1-V18_025	DFEFRHDSGYEVHHQKLV
809	FP_D1-V18_026	DGEFRHDSGYEVHHQKLV
810	FP_D1-V18_027	DHEFRHDSGYEVHHQKLV
811	FP_D1-V18_028	DIEFRHDSGYEVHHQKLV
812	FP_D1-V18_029	DKEFRHDSGYEVHHQKLV
813	FP_D1-V18_030	DLEFRHDSGYEVHHQKLV
814	FP_D1-V18_031	DMEFRHDSGYEVHHQKLV
815	FP_D1-V18_032	DNEFRHDSGYEVHHQKLV
816	FP_D1-V18_033	DPEFRHDSGYEVHHQKLV
817	FP_D1-V18_034	DQEFRHDSGYEVHHQKLV
818	FP_D1-V18_035	DREFRHDSGYEVHHQKLV
819	FP_D1-V18_036	DSEFRHDSGYEVHHQKLV
820	FP_D1-V18_037	DTEFRHDSGYEVHHQKLV
821	FP_D1-V18_038	DVEFRHDSGYEVHHQKLV
822	FP_D1-V18_039	DWEFRHDSGYEVHHQKLV
823	FP_D1-V18_040	DYEFRHDSGYEVHHQKLV
824	FP_D1-V18_041	DAAFRHDSGYEVHHQKLV
825	FP_D1-V18_042	DACFRHDSGYEVHHQKLV
826	FP_D1-V18_043	DADFRHDSGYEVHHQKLV
827	FP_D1-V18_044	DAEFRHDSGYEVHHQKLV
828	FP_D1-V18_045	DAFFRHDSGYEVHHQKLV
829	FP_D1-V18_046	DAGFRHDSGYEVHHQKLV
830	FP_D1-V18_047	DAHFRHDSGYEVHHQKLV
831	FP_D1-V18_048	DAIFRHDSGYEVHHQKLV
832	FP_D1-V18_049	DAKFRHDSGYEVHHQKLV
833	FP_D1-V18_050	DALFRHDSGYEVHHQKLV
834	FP_D1-V18_051	DAMFRHDSGYEVHHQKLV
835	FP_D1-V18_052	DANFRHDSGYEVHHQKLV
836	FP_D1-V18_053	DAPFRHDSGYEVHHQKLV
837	FP_D1-V18_054	DAQFRHDSGYEVHHQKLV
838	FP_D1-V18_055	DARFRHDSGYEVHHQKLV
839	FP_D1-V18_056	DASFRHDSGYEVHHQKLV
840	FP_D1-V18_057	DATFRHDSGYEVHHQKLV
841	FP_D1-V18_058	DAVFRHDSGYEVHHQKLV
842	FP_D1-V18_059	DAWFRHDSGYEVHHQKLV
843	FP_D1-V18_060	DAYFRHDSGYEVHHQKLV
844	FP_D1-V18_061	DAEARHDSGYEVHHQKLV
845	FP_D1-V18_062	DAECRHDSGYEVHHQKLV
846	FP_D1-V18_063	DAEDRHDSGYEVHHQKLV
847	FP_D1-V18_064	DAEERHDSGYEVHHQKLV
848	FP_D1-V18_065	DAEFRHDSGYEVHHQKLV
849	FP_D1-V18_066	DAEGRHDSGYEVHHQKLV
850	FP_D1-V18_067	DAEHRHDSGYEVHHQKLV
851	FP_D1-V18_068	DAEIRHDSGYEVHHQKLV
852	FP_D1-V18_069	DAEKRHDSGYEVHHQKLV
853	FP_D1-V18_070	DAELRHDSGYEVHHQKLV
854	FP_D1-V18_071	DAEMRHDSGYEVHHQKLV
855	FP_D1-V18_072	DAENRHDSGYEVHHQKLV
856	FP_D1-V18_073	DAEPRHDSGYEVHHQKLV
857	FP_D1-V18_074	DAEQRHDSGYEVHHQKLV
858	FP_D1-V18_075	DAERRHDSGYEVHHQKLV
859	FP_D1-V18_076	DAESRHDSGYEVHHQKLV
860	FP_D1-V18_077	DAETRHDSGYEVHHQKLV
861	FP_D1-V18_078	DAEVRHDSGYEVHHQKLV
862	FP_D1-V18_079	DAEWRHDSGYEVHHQKLV
863	FP_D1-V18_080	DAEYRHDSGYEVHHQKLV
864	FP_D1-V18_081	DAEFAHDSGYEVHHQKLV
865	FP_D1-V18_082	DAEFCHDSGYEVHHQKLV
866	FP_D1-V18_083	DAEFDHDSGYEVHHQKLV
867	FP_D1-V18_084	DAEFEHDSGYEVHHQKLV
868	FP_D1-V18_085	DAEFFHDSGYEVHHQKLV
869	FP_D1-V18_086	DAEFGHDSGYEVHHQKLV
870	FP_D1-V18_087	DAEFHHDSGYEVHHQKLV
871	FP_D1-V18_088	DAEFIHDSGYEVHHQKLV
872	FP_D1-V18_089	DAEFKHDSGYEVHHQKLV
873	FP_D1-V18_090	DAEFLHDSGYEVHHQKLV
874	FP_D1-V18_091	DAEFMHDSGYEVHHQKLV
875	FP_D1-V18_092	DAEFNHDSGYEVHHQKLV
876	FP_D1-V18_093	DAEFPHDSGYEVHHQKLV
877	FP_D1-V18_094	DAEFQHDSGYEVHHQKLV
878	FP_D1-V18_095	DAEFRHDSGYEVHHQKLV
879	FP_D1-V18_096	DAEFSHDSGYEVHHQKLV
880	FP_D1-V18_097	DAEFTHDSGYEVHHQKLV
881	FP_D1-V18_098	DAEFVHDSGYEVHHQKLV
882	FP_D1-V18_099	DAEFWHDSGYEVHHQKLV
883	FP_D1-V18_100	DAEFYHDSGYEVHHQKLV
884	FP_D1-V18_101	DAEFRADSGYEVHHQKLV
885	FP_D1-V18_102	DAEFRCDSGYEVHHQKLV
886	FP_D1-V18_103	DAEFRDDSGYEVHHQKLV
887	FP_D1-V18_104	DAEFREDSGYEVHHQKLV
888	FP_D1-V18_105	DAEFRFDSGYEVHHQKLV
889	FP_D1-V18_106	DAEFRGDSGYEVHHQKLV
890	FP_D1-V18_107	DAEFRHDSGYEVHHQKLV
891	FP_D1-V18_108	DAEFRIDSGYEVHHQKLV
892	FP_D1-V18_109	DAEFRKDSGYEVHHQKLV
893	FP_D1-V18_110	DAEFRLDSGYEVHHQKLV
894	FP_D1-V18_111	DAEFRMDSGYEVHHQKLV
895	FP_D1-V18_112	DAEFRNDSGYEVHHQKLV
896	FP_D1-V18_113	DAEFRPDSGYEVHHQKLV
897	FP_D1-V18_114	DAEFRQDSGYEVHHQKLV
898	FP_D1-V18_115	DAEFRRDSGYEVHHQKLV
899	FP_D1-V18_116	DAEFRSDSGYEVHHQKLV
900	FP_D1-V18_117	DAEFRTDSGYEVHHQKLV
901	FP_D1-V18_118	DAEFRVDSGYEVHHQKLV
902	FP_D1-V18_119	DAEFRWDSGYEVHHQKLV
903	FP_D1-V18_120	DAEFRYDSGYEVHHQKLV
904	FP_D1-V18_121	DAEFRHASGYEVHHQKLV
905	FP_D1-V18_122	DAEFRHCSGYEVHHQKLV
906	FP_D1-V18_123	DAEFRHDSGYEVHHQKLV
907	FP_D1-V18_124	DAEFRHESGYEVHHQKLV
908	FP_D1-V18_125	DAEFRHFSGYEVHHQKLV
909	FP_D1-V18_126	DAEFRHGSGYEVHHQKLV
910	FP_D1-V18_127	DAEFRHHSGYEVHHQKLV
911	FP_D1-V18_128	DAEFRHISGYEVHHQKLV
912	FP_D1-V18_129	DAEFRHKSGYEVHHQKLV
913	FP_D1-V18_130	DAEFRHLSGYEVHHQKLV
914	FP_D1-V18_131	DAEFRHMSGYEVHHQKLV
915	FP_D1-V18_132	DAEFRHNSGYEVHHQKLV
916	FP_D1-V18_133	DAEFRHPSGYEVHHQKLV
917	FP_D1-V18_134	DAEFRHQSGYEVHHQKLV
918	FP_D1-V18_135	DAEFRHRSGYEVHHQKLV
919	FP_D1-V18_136	DAEFRHSSGYEVHHQKLV
920	FP_D1-V18_137	DAEFRHTSGYEVHHQKLV
921	FP_D1-V18_138	DAEFRHVSGYEVHHQKLV
922	FP_D1-V18_139	DAEFRHWSGYEVHHQKLV
923	FP_D1-V18_140	DAEFRHYSGYEVHHQKLV
924	FP_D1-V18_141	DAEFRHDAGYEVHHQKLV
925	FP_D1-V18_142	DAEFRHDCGYEVHHQKLV
926	FP_D1-V18_143	DAEFRHDDGYEVHHQKLV
927	FP_D1-V18_144	DAEFRHDEGYEVHHQKLV
928	FP_D1-V18_145	DAEFRHDFGYEVHHQKLV
929	FP_D1-V18_146	DAEFRHDGGYEVHHQKLV
930	FP_D1-V18_147	DAEFRHDHGYEVHHQKLV
931	FP_D1-V18_148	DAEFRHDIGYEVHHQKLV
932	FP_D1-V18_149	DAEFRHDKGYEVHHQKLV
933	FP_D1-V18_150	DAEFRHDLGYEVHHQKLV
934	FP_D1-V18_151	DAEFRHDMGYEVHHQKLV
935	FP_D1-V18_152	DAEFRHDNGYEVHHQKLV
936	FP_D1-V18_153	DAEFRHDPGYEVHHQKLV
937	FP_D1-V18_154	DAEFRHDQGYEVHHQKLV
938	FP_D1-V18_155	DAEFRHDRGYEVHHQKLV
939	FP_D1-V18_156	DAEFRHDSGYEVHHQKLV
940	FP_D1-V18_157	DAEFRHDTGYEVHHQKLV
941	FP_D1-V18_158	DAEFRHDVGYEVHHQKLV
942	FP_D1-V18_159	DAEFRHDWGYEVHHQKLV
943	FP_D1-V18_160	DAEFRHDYGYEVHHQKLV
944	FP_D1-V18_161	DAEFRHDSAYEVHHQKLV
945	FP_D1-V18_162	DAEFRHDSCYEVHHQKLV
946	FP_D1-V18_163	DAEFRHDSDYEVHHQKLV
947	FP_D1-V18_164	DAEFRHDSEYEVHHQKLV
948	FP_D1-V18_165	DAEFRHDSFYEVHHQKLV
949	FP_D1-V18_166	DAEFRHDSGYEVHHQKLV
950	FP_D1-V18_167	DAEFRHDSHYEVHHQKLV
951	FP_D1-V18_168	DAEFRHDSIYEVHHQKLV
952	FP_D1-V18_169	DAEFRHDSKYEVHHQKLV
953	FP_D1-V18_170	DAEFRHDSLYEVHHQKLV
954	FP_D1-V18_171	DAEFRHDSMYEVHHQKLV
955	FP_D1-V18_172	DAEFRHDSNYEVHHQKLV
956	FP_D1-V18_173	DAEFRHDSPYEVHHQKLV
957	FP_D1-V18_174	DAEFRHDSQYEVHHQKLV
958	FP_D1-V18_175	DAEFRHDSRYEVHHQKLV
959	FP_D1-V18_176	DAEFRHDSSYEVHHQKLV
960	FP_D1-V18_177	DAEFRHDSTYEVHHQKLV
961	FP_D1-V18_178	DAEFRHDSVYEVHHQKLV
962	FP_D1-V18_179	DAEFRHDSWYEVHHQKLV
963	FP_D1-V18_180	DAEFRHDSYYEVHHQKLV
964	FP_D1-V18_181	DAEFRHDSGAEVHHQKLV
965	FP_D1-V18_182	DAEFRHDSGCEVHHQKLV
966	FP_D1-V18_183	DAEFRHDSGDEVHHQKLV
967	FP_D1-V18_184	DAEFRHDSGEEVHHQKLV
968	FP_D1-V18_185	DAEFRHDSGFEVHHQKLV
969	FP_D1-V18_186	DAEFRHDSGGEVHHQKLV
970	FP_D1-V18_187	DAEFRHDSGHEVHHQKLV
971	FP_D1-V18_188	DAEFRHDSGIEVHHQKLV
972	FP_D1-V18_189	DAEFRHDSGKEVHHQKLV
973	FP_D1-V18_190	DAEFRHDSGLEVHHQKLV
974	FP_D1-V18_191	DAEFRHDSGMEVHHQKLV
975	FP_D1-V18_192	DAEFRHDSGNEVHHQKLV
976	FP_D1-V18_193	DAEFRHDSGPEVHHQKLV
977	FP_D1-V18_194	DAEFRHDSGQEVHHQKLV
978	FP_D1-V18_195	DAEFRHDSGREVHHQKLV
979	FP_D1-V18_196	DAEFRHDSGSEVHHQKLV
980	FP_D1-V18_197	DAEFRHDSGTEVHHQKLV
981	FP_D1-V18_198	DAEFRHDSGVEVHHQKLV
982	FP_D1-V18_199	DAEFRHDSGWEVHHQKLV
983	FP_D1-V18_200	DAEFRHDSGYEVHHQKLV
984	FP_D1-V18_201	DAEFRHDSGYAVHHQKLV
985	FP_D1-V18_202	DAEFRHDSGYCVHHQKLV
986	FP_D1-V18_203	DAEFRHDSGYDVHHQKLV
987	FP_D1-V18_204	DAEFRHDSGYEVHHQKLV
988	FP_D1-V18_205	DAEFRHDSGYFVHHQKLV
989	FP_D1-V18_206	DAEFRHDSGYGVHHQKLV
990	FP_D1-V18_207	DAEFRHDSGYHVHHQKLV
991	FP_D1-V18_208	DAEFRHDSGYIVHHQKLV
992	FP_D1-V18_209	DAEFRHDSGYKVHHQKLV
993	FP_D1-V18_210	DAEFRHDSGYLVHHQKLV
994	FP_D1-V18_211	DAEFRHDSGYMVHHQKLV
995	FP_D1-V18_212	DAEFRHDSGYNVHHQKLV
996	FP_D1-V18_213	DAEFRHDSGYPVHHQKLV
997	FP_D1-V18_214	DAEFRHDSGYQVHHQKLV
998	FP_D1-V18_215	DAEFRHDSGYRVHHQKLV
999	FP_D1-V18_216	DAEFRHDSGYSVHHQKLV
1000	FP_D1-V18_217	DAEFRHDSGYTVHHQKLV
1001	FP_D1-V18_218	DAEFRHDSGYVVHHQKLV
1002	FP_D1-V18_219	DAEFRHDSGYWVHHQKLV
1003	FP_D1-V18_220	DAEFRHDSGYYVHHQKLV
1004	FP_D1-V18_221	DAEFRHDSGYEAHHQKLV
1005	FP_D1-V18_222	DAEFRHDSGYECHHQKLV
1006	FP_D1-V18_223	DAEFRHDSGYEDHHQKLV
1007	FP_D1-V18_224	DAEFRHDSGYEEHHQKLV
1008	FP_D1-V18_225	DAEFRHDSGYEFHHQKLV
1009	FP_D1-V18_226	DAEFRHDSGYEGHHQKLV
1010	FP_D1-V18_227	DAEFRHDSGYEHHHQKLV
1011	FP_D1-V18_228	DAEFRHDSGYEIHHQKLV
1012	FP_D1-V18_229	DAEFRHDSGYEKHHQKLV
1013	FP_D1-V18_230	DAEFRHDSGYELHHQKLV
1014	FP_D1-V18_231	DAEFRHDSGYEMHHQKLV
1015	FP_D1-V18_232	DAEFRHDSGYENHHQKLV
1016	FP_D1-V18_233	DAEFRHDSGYEPHHQKLV
1017	FP_D1-V18_234	DAEFRHDSGYEQHHQKLV
1018	FP_D1-V18_235	DAEFRHDSGYERHHQKLV
1019	FP_D1-V18_236	DAEFRHDSGYESHHQKLV
1020	FP_D1-V18_237	DAEFRHDSGYETHHQKLV
1021	FP_D1-V18_238	DAEFRHDSGYEVHHQKLV
1022	FP_D1-V18_239	DAEFRHDSGYEWHHQKLV
1023	FP_D1-V18_240	DAEFRHDSGYEYHHQKLV
1024	FP_D1-V18_241	DAEFRHDSGYEVAHQKLV
1025	FP_D1-V18_242	DAEFRHDSGYEVCHQKLV
1026	FP_D1-V18_243	DAEFRHDSGYEVDHQKLV
1027	FP_D1-V18_244	DAEFRHDSGYEVEHQKLV
1028	FP_D1-V18_245	DAEFRHDSGYEVFHQKLV
1029	FP_D1-V18_246	DAEFRHDSGYEVGHQKLV
1030	FP_D1-V18_247	DAEFRHDSGYEVHHQKLV
1031	FP_D1-V18_248	DAEFRHDSGYEVIHQKLV
1032	FP_D1-V18_249	DAEFRHDSGYEVKHQKLV
1033	FP_D1-V18_250	DAEFRHDSGYEVLHQKLV
1034	FP_D1-V18_251	DAEFRHDSGYEVMHQKLV
1035	FP_D1-V18_252	DAEFRHDSGYEVNHQKLV
1036	FP_D1-V18_253	DAEFRHDSGYEVPHQKLV
1037	FP_D1-V18_254	DAEFRHDSGYEVQHQKLV
1038	FP_D1-V18_255	DAEFRHDSGYEVRHQKLV
1039	FP_D1-V18_256	DAEFRHDSGYEVSHQKLV
1040	FP_D1-V18_257	DAEFRHDSGYEVTHQKLV
1041	FP_D1-V18_258	DAEFRHDSGYEVVHQKLV
1042	FP_D1-V18_259	DAEFRHDSGYEVWHQKLV
1043	FP_D1-V18_260	DAEFRHDSGYEVYHQKLV
1044	FP_D1-V18_261	DAEFRHDSGYEVHAQKLV
1045	FP_D1-V18_262	DAEFRHDSGYEVHCQKLV
1046	FP_D1-V18_263	DAEFRHDSGYEVHDQKLV
1047	FP_D1-V18_264	DAEFRHDSGYEVHEQKLV
1048	FP_D1-V18_265	DAEFRHDSGYEVHFQKLV
1049	FP_D1-V18_266	DAEFRHDSGYEVHGQKLV
1050	FP_D1-V18_267	DAEFRHDSGYEVHHQKLV
1051	FP_D1-V18_268	DAEFRHDSGYEVHIQKLV
1052	FP_D1-V18_269	DAEFRHDSGYEVHKQKLV
1053	FP_D1-V18_270	DAEFRHDSGYEVHLQKLV
1054	FP_D1-V18_271	DAEFRHDSGYEVHMQKLV
1055	FP_D1-V18_272	DAEFRHDSGYEVHNQKLV
1056	FP_D1-V18_273	DAEFRHDSGYEVHPQKLV
1057	FP_D1-V18_274	DAEFRHDSGYEVHQQKLV
1058	FP_D1-V18_275	DAEFRHDSGYEVHRQKLV
1059	FP_D1-V18_276	DAEFRHDSGYEVHSQKLV
1060	FP_D1-V18_277	DAEFRHDSGYEVHTQKLV
1061	FP_D1-V18_278	DAEFRHDSGYEVHVQKLV
1062	FP_D1-V18_279	DAEFRHDSGYEVHWQKLV
1063	FP_D1-V18_280	DAEFRHDSGYEVHYQKLV
1064	FP_D1-V18_281	DAEFRHDSGYEVHHAKLV
1065	FP_D1-V18_282	DAEFRHDSGYEVHHCKLV
1066	FP_D1-V18_283	DAEFRHDSGYEVHHDKLV
1067	FP_D1-V18_284	DAEFRHDSGYEVHHEKLV
1068	FP_D1-V18_285	DAEFRHDSGYEVHHFKLV
1069	FP_D1-V18_286	DAEFRHDSGYEVHHGKLV
1070	FP_D1-V18_287	DAEFRHDSGYEVHHHKLV
1071	FP_D1-V18_288	DAEFRHDSGYEVHHIKLV
1072	FP_D1-V18_289	DAEFRHDSGYEVHHKKLV
1073	FP_D1-V18_290	DAEFRHDSGYEVHHLKLV
1074	FP_D1-V18_291	DAEFRHDSGYEVHHMKLV
1075	FP_D1-V18_292	DAEFRHDSGYEVHHNKLV
1076	FP_D1-V18_293	DAEFRHDSGYEVHHPKLV
1077	FP_D1-V18_294	DAEFRHDSGYEVHHQKLV
1078	FP_D1-V18_295	DAEFRHDSGYEVHHRKLV
1079	FP_D1-V18_296	DAEFRHDSGYEVHHSKLV
1080	FP_D1-V18_297	DAEFRHDSGYEVHHTKLV
1081	FP_D1-V18_298	DAEFRHDSGYEVHHVKLV
1082	FP_D1-V18_299	DAEFRHDSGYEVHHWKLV
1083	FP_D1-V18_300	DAEFRHDSGYEVHHYKLV
1084	FP_D1-V18_301	DAEFRHDSGYEVHHQALV
1085	FP_D1-V18_302	DAEFRHDSGYEVHHQCLV
1086	FP_D1-V18_303	DAEFRHDSGYEVHHQDLV
1087	FP_D1-V18_304	DAEFRHDSGYEVHHQELV
1088	FP_D1-V18_305	DAEFRHDSGYEVHHQFLV
1089	FP_D1-V18_306	DAEFRHDSGYEVHHQGLV
1090	FP_D1-V18_307	DAEFRHDSGYEVHHQHLV
1091	FP_D1-V18_308	DAEFRHDSGYEVHHQILV
1092	FP_D1-V18_309	DAEFRHDSGYEVHHQKLV
1093	FP_D1-V18_310	DAEFRHDSGYEVHHQLLV
1094	FP_D1-V18_311	DAEFRHDSGYEVHHQMLV
1095	FP_D1-V18_312	DAEFRHDSGYEVHHQNLV
1096	FP_D1-V18_313	DAEFRHDSGYEVHHQPLV
1097	FP_D1-V18_314	DAEFRHDSGYEVHHQQLV
1098	FP_D1-V18_315	DAEFRHDSGYEVHHQRLV
1099	FP_D1-V18_316	DAEFRHDSGYEVHHQSLV
1100	FP_D1-V18_317	DAEFRHDSGYEVHHQTLV
1101	FP_D1-V18_318	DAEFRHDSGYEVHHQVLV
1102	FP_D1-V18_319	DAEFRHDSGYEVHHQWLV
1103	FP_D1-V18_320	DAEFRHDSGYEVHHQYLV
1104	FP_D1-V18_321	DAEFRHDSGYEVHHQKAV
1105	FP_D1-V18_322	DAEFRHDSGYEVHHQKCV
1106	FP_D1-V18_323	DAEFRHDSGYEVHHQKDV
1107	FP_D1-V18_324	DAEFRHDSGYEVHHQKEV
1108	FP_D1-V18_325	DAEFRHDSGYEVHHQKFV
1109	FP_D1-V18_326	DAEFRHDSGYEVHHQKGV
1110	FP_D1-V18_327	DAEFRHDSGYEVHHQKHV
1111	FP_D1-V18_328	DAEFRHDSGYEVHHQKIV
1112	FP_D1-V18_329	DAEFRHDSGYEVHHQKKV
1113	FP_D1-V18_330	DAEFRHDSGYEVHHQKLV
1114	FP_D1-V18_331	DAEFRHDSGYEVHHQKMV
1115	FP_D1-V18_332	DAEFRHDSGYEVHHQKNV
1116	FP_D1-V18_333	DAEFRHDSGYEVHHQKPV
1117	FP_D1-V18_334	DAEFRHDSGYEVHHQKQV
1118	FP_D1-V18_335	DAEFRHDSGYEVHHQKRV
1119	FP_D1-V18_336	DAEFRHDSGYEVHHQKSV
1120	FP_D1-V18_337	DAEFRHDSGYEVHHQKTV
1121	FP_D1-V18_338	DAEFRHDSGYEVHHQKVV
1122	FP_D1-V18_339	DAEFRHDSGYEVHHQKWV
1123	FP_D1-V18_340	DAEFRHDSGYEVHHQKYV
1124	FP_D1-V18_341	DAEFRHDSGYEVHHQKLA
1125	FP_D1-V18_342	DAEFRHDSGYEVHHQKLC
1126	FP_D1-V18_343	DAEFRHDSGYEVHHQKLD
1127	FP_D1-V18_344	DAEFRHDSGYEVHHQKLE
1128	FP_D1-V18_345	DAEFRHDSGYEVHHQKLF
1129	FP_D1-V18_346	DAEFRHDSGYEVHHQKLG
1130	FP_D1-V18_347	DAEFRHDSGYEVHHQKLH
1131	FP_D1-V18_348	DAEFRHDSGYEVHHQKLI
1132	FP_D1-V18_349	DAEFRHDSGYEVHHQKLK
1133	FP_D1-V18_350	DAEFRHDSGYEVHHQKLL
1134	FP_D1-V18_351	DAEFRHDSGYEVHHQKLM
1135	FP_D1-V18_352	DAEFRHDSGYEVHHQKLN
1136	FP_D1-V18_353	DAEFRHDSGYEVHHQKLP
1137	FP_D1-V18_354	DAEFRHDSGYEVHHQKLQ
1138	FP_D1-V18_355	DAEFRHDSGYEVHHQKLR
1139	FP_D1-V18_356	DAEFRHDSGYEVHHQKLS
1140	FP_D1-V18_357	DAEFRHDSGYEVHHQKLT
1141	FP_D1-V18_358	DAEFRHDSGYEVHHQKLV
1142	FP_D1-V18_359	DAEFRHDSGYEVHHQKLW
1143	FP_D1-V18_360	DAEFRHDSGYEVHHQKLY
1144	Abeta_S8_scan_WT_01	EEISEVKMDAEFRHD
1145	Abeta_S8_scan_WT_02	EISEVKMDAEFRHDS
1146	Abeta_S8_scan_WT_03	ISEVKMDAEFRHDSG
1147	Abeta_S8_scan_WT_04	SEVKMDAEFRHDSGY
1148	Abeta_S8_scan_WT_05	EVKMDAEFRHDSGYE
1149	Abeta_S8_scan_WT_06	VKMDAEFRHDSGYEV
1150	Abeta_S8_scan_WT_07	KMDAEFRHDSGYEVH
1151	Abeta_S8_scan_WT_08	MDAEFRHDSGYEVHH
1152	Abeta_S8_scan_WT_09	DAEFRHDSGYEVHHQ
1153	Abeta_S8_scan_WT_10	AEFRHDSGYEVHHQK
1154	Abeta_S8_scan_WT_11	EFRHDSGYEVHHQKL
1155	Abeta_S8_scan_WT_12	FRHDSGYEVHHQKLV
1156	Abeta_S8_scan_WT_13	RHDSGYEVHHQKLVF
1157	Abeta_S8_scan_WT_14	HDSGYEVHHQKLVFF
1158	Abeta_S8_scan_WT_15	DSGYEVHHQKLVFFA
1159	Abeta_S8_scan_WT_16	SGYEVHHQKLVFFAE
1160	Abeta_S8_scan_WT_17	GYEVHHQKLVFFAED
1161	Abeta_S8_scan_phospo_01	EEISEVKMDAEFRHD
1162	Abeta_S8_scan_phospo_02	EISEVKMDAEFRHD2
1163	Abeta_S8_scan_phospo_03	ISEVKMDAEFRHD2G
1164	Abeta_S8_scan_phospo_04	SEVKMDAEFRHD2GY
1165	Abeta_S8_scan_phospo_05	EVKMDAEFRHD2GYE
1166	Abeta_S8_scan_phospo_06	VKMDAEFRHD2GYEV
1167	Abeta_S8_scan_phospo_07	KMDAEFRHD2GYEVH
1168	Abeta_S8_scan_phospo_08	MDAEFRHD2GYEVHH
1169	Abeta_S8_scan_phospo_09	DAEFRHD2GYEVHHQ
1170	Abeta_S8_scan_phospo_10	AEFRHD2GYEVHHQK
1171	Abeta_S8_scan_phospo_11	EFRHD2GYEVHHQKL
1172	Abeta_S8_scan_phospo_12	FRHD2GYEVHHQKLV
1173	Abeta_S8_scan_phospo_13	RHD2GYEVHHQKLVF
1174	Abeta_S8_scan_phospo_14	HD2GYEVHHQKLVFF
1175	Abeta_S8_scan_phospo_15	D2GYEVHHQKLVFFA
1176	Abeta_S8_scan_phospo_16	2GYEVHHQKLVFFAE
1177	Abeta_S8_scan_phospo_17	GYEVHHQKLVFFAED
1178	Abeta_S26_scan_WT_01	EVHHQKLVFFAEDVG
1179	Abeta_S26_scan_WT_02	VHHQKLVFFAEDVGS
1180	Abeta_S26_scan_WT_03	HHQKLVFFAEDVGSN
1181	Abeta_S26_scan_WT_04	HQKLVFFAEDVGSNK
1182	Abeta_S26_scan_WT_05	QKLVFFAEDVGSNKG
1183	Abeta_S26_scan_WT_06	KLVFFAEDVGSNKGA
1184	Abeta_S26_scan_WT_07	LVFFAEDVGSNKGAI
1185	Abeta_S26_scan_WT_08	VFFAEDVGSNKGAII
1186	Abeta_S26_scan_WT_09	FFAEDVGSNKGAIIG
1187	Abeta_S26_scan_WT_10	FAEDVGSNKGAIIGL
1188	Abeta_S26_scan_WT_11	AEDVGSNKGAIIGLM
1189	Abeta_S26_scan_WT_12	EDVGSNKGAIIGLMV
1190	Abeta_S26_scan_WT_13	DVGSNKGAIIGLMVG
1191	Abeta_S26_scan_WT_14	VGSNKGAIIGLMVGG
1192	Abeta_S26_scan_WT_15	GSNKGAIIGLMVGGV
1193	Abeta_S26_scan_WT_16	SNKGAIIGLMVGGVV
1194	Abeta_S26_scan_WT_17	NKGAIIGLMVGGVVI
1195	Abeta_S26_scan_phospo_01	EVHHQKLVFFAEDVG
1196	Abeta_S26_scan_phospo_02	VHHQKLVFFAEDVG2
1197	Abeta_S26_scan_phospo_03	HHQKLVFFAEDVG2N
1198	Abeta_S26_scan_phospo_04	HQKLVFFAEDVG2NK
1199	Abeta_S26_scan_phospo_05	QKLVFFAEDVG2NKG
1200	Abeta_S26_scan_phospo_06	KLVFFAEDVG2NKGA
1201	Abeta_S26_scan_phospo_07	LVFFAEDVG2NKGAI
1202	Abeta_S26_scan_phospo_08	VFFAEDVG2NKGAII
1203	Abeta_S26_scan_phospo_09	FFAEDVG2NKGAIIG
1204	Abeta_S26_scan_phospo_10	FAEDVG2NKGAIIGL
1205	Abeta_S26_scan_phospo_11	AEDVG2NKGAIIGLM
1206	Abeta_S26_scan_phospo_12	EDVG2NKGAIIGLMV
1207	Abeta_S26_scan_phospo_13	DVG2NKGAIIGLMVG
1208	Abeta_S26_scan_phospo_14	VG2NKGAIIGLMVGG
1209	Abeta_S26_scan_phospo_15	G2NKGAIIGLMVGGV
1210	Abeta_S26_scan_phospo_16	2NKGAIIGLMVGGVV
1211	Abeta_S26_scan_phospo_17	NKGAIIGLMVGGVVI
1212	Abeta_D1-WT_01	DAEFRHDSGYEVHHQ
1213	Abeta_D1-WT_02	DAEFRHDSGYEVHHQ
1214	Abeta_D1-WT_03	DAEFRHDSGYEVHHQ
1215	Abeta_D1_d_01	5AEFRHDSGYEVHHQ
1216	Abeta_D1_d_02	5AEFRHDSGYEVHHQ
1217	Abeta_D1_d_03	5AEFRHDSGYEVHHQ
1218	Abeta _D1-d,iso_01	7AEFRHDSGYEVHHQ
1219	Abeta _D1-d,iso_02	7AEFRHDSGYEVHHQ
1220	Abeta _D1-d,iso_03	7AEFRHDSGYEVHHQ
1221	Abeta_D1-l,iso_01	6AEFRHDSGYEVHHQ
1222	Abeta_D1-l,iso_02	6AEFRHDSGYEVHHQ
1223	Abeta_D1-l,iso_03	6AEFRHDSGYEVHHQ
1224	Abeta_D1-1_01	MDAEFRHDSGYEVHH
1225	Abeta_D1-1_02	MDAEFRHDSGYEVHH
1226	Abeta_D1-1_03	MDAEFRHDSGYEVHH
1227	Abeta_E3_WT	EFRHDSGYEVHHQKL
1228	Abeta_E3_WT	EFRHDSGYEVHHQKL
1229	Abeta_E3_WT	EFRHDSGYEVHHQKL
1230	Abeta_E3_pyro	8FRHDSGYEVHHQKL
1231	Abeta_E3_pyro	8FRHDSGYEVHHQKL
1232	Abeta_E3_pyro	8FRHDSGYEVHHQKL
1233	Abeta_E11_WT	EVHHQKLVFFAEDVG
1234	Abeta_E11_WT	EVHHQKLVFFAEDVG
1235	Abeta_E11_WT	EVHHQKLVFFAEDVG
1236	Abeta_E11_pyro	8VHHQKLVFFAEDVG
1237	Abeta_E11_pyro	8VHHQKLVFFAEDVG
1238	Abeta_E11_pyro	8VHHQKLVFFAEDVG
